# Supplementary material
Source: PubMed Central journal article supplement (PMC5899475)
Supplement: pnas.1722329115.sapp.pdf [file pnas.1722329115.sapp.pdf]

## Supporting Information Appendix

# **Binding site for coenzyme A revealed in the structure of pyruvate:ferredoxin oxidoreductase from *Moorella thermoacetica***

Percival Yang-Ting Chen<sup>a</sup>, Heather Aman<sup>b</sup>, Mehmet Can<sup>b</sup>, Stephen W. Ragsdale<sup>b</sup>, Catherine L. Drennan<sup>a,c,d</sup>

<sup>a</sup>Department of Chemistry, <sup>c</sup>Department of Biology, and <sup>d</sup>Howard Hughes Medical Institute, Massachusetts Institute of Technology, Cambridge, MA 02139, United States

<sup>b</sup>Department of Biological Chemistry, University of Michigan, Ann Arbor, Michigan 48109, United States

**SI Appendix – Materials and Methods**

**SI Appendix – Figures S1-S11**

**SI Appendix – Tables S1-S4**

**SI Appendix – References**

**SI Appendix – Materials and Methods**

**Protein purification and activity.** *Moorella thermoacetica* growth, enzyme isolation and protein quantification were performed as described previously (1). However, in the purification protocol, Tris-HCl buffer at pH 7.6 was used instead of MOPS. Enzyme quality was assessed by sodium dodecyl sulfate-polyacrylamide gel electrophoresis (SDS-PAGE) and enzyme activity assays. Enzyme assays were conducted at 20 °C in 50 mM Tris-HCl buffer at pH 7.6 including 2 mM DTT, 1 mM TPP, 1 mM MgCl<sub>2</sub>, 1 mM Coenzyme A hydrate, 10 mM sodium pyruvate, and 10 mM oxidized methyl viologen. The assay was started by adding PFOR and the absorbance at 578 nm of reduced methyl viologen was followed as a function of time. Activities of the different preparations of enzyme used in this study appeared homogeneous by SDS-PAGE analyses and exhibited pyruvate oxidoreductase activities of 8.3, 12.0, and 13.8 μmol pyruvate oxidized min<sup>-1</sup> mg<sup>-1</sup>.

**Crystallization of native *Mt*PFOR and pyruvate soaking experiment.** *Mt*PFOR was crystallized by sitting drop crystallization method in a Coy anaerobic chamber with an Ar/H<sub>2</sub> environment at room temperature. Brown plate crystals grew within 4-7 days of mixing 1.5 μL of 6.2 mg/mL *Mt*PFOR in storage buffer (50 mM Tris pH 7.5, 1 mM TPP (Sigma-Aldrich), and 1 mM MgCl<sub>2</sub>) with 0.5 μL well solution (15-16% (w/v) PEG 4000, 0.21 M (NH<sub>4</sub>)<sub>2</sub>SO<sub>4</sub>, and 0.10 M MES pH 6.0) to make a 2.0 μL sitting drop in a sealed well with 500 μL well solution. The crystal used to determine the native structure was transferred to cryoprotectant (20% (v/v) glycerol, 20% (w/v) PEG 4000, 0.07 M (NH<sub>4</sub>)<sub>2</sub>SO<sub>4</sub>, and 0.10 M MES pH 6.0) briefly and flash-cooled in liquid nitrogen. The crystals used in pyruvate soaking experiments were transferred into cryoprotectant (20% (v/v) glycerol, 20% (w/v) PEG 4000, 0.18 M (NH<sub>4</sub>)<sub>2</sub>SO<sub>4</sub>, 0.10 M MES pH 6.0, and 50 mM pyruvate (Sigma-Aldrich)) for 15 mins or 12 hrs and flash-cooled in liquid nitrogen. All the chemicals, unless stated otherwise, are from Hampton Research. The native *Mt*PFOR and pyruvate-soaked PFOR crystals formed in the space group *C2* with unit cell constants  $a = 340 \text{ \AA}$ ,  $b = 108 \text{ \AA}$ , and  $c = 240 \text{ \AA}$ ,  $\beta = 109^\circ$ .

**Cocrystallization of *Mt*PFOR with coenzyme A.** *Mt*PFOR was crystallized with CoA in a Coy anaerobic chamber with an Ar/H<sub>2</sub> environment at room temperature using the sitting drop crystallization method. Brown plate crystals grew within 7 days of mixing 1.5 μL of 5.2 mg/mL *Mt*PFOR in storage buffer with coenzyme A (50 mM Tris pH 7.5, 1 mM TPP (Sigma-Aldrich), 1 mM MgCl<sub>2</sub>, and 10 mM CoA (Sigma-Aldrich)) with 0.5 μL

well solution (13% (w/v) PEG 6000 and 0.06 M sodium cacodylate pH 6.5) to make a 2.0  $\mu\text{L}$  sitting drop in a sealed well with 500  $\mu\text{L}$  of well solution. The crystal used to determine the CoA cocrystal structure was briefly soaked into a cryoprotectant (10 mM CoA (Sigma-Aldrich), 15% (w/v) PEG 6000, and 20% (v/v) glycerol) and flash-cooled in liquid nitrogen. All the chemicals, unless stated otherwise, are from Hampton Research. Crystals formed in space group *C2* with unit cell constants  $a = 338 \text{ \AA}$ ,  $b = 107 \text{ \AA}$ , and  $c = 120 \text{ \AA}$ ,  $\beta = 110^\circ$ .

**Data collection and processing.** Data were collected at the Advanced Photon Source on Northeastern Collaborative Access Team beamline 24-ID-C on a Pilatus 6MF detector. Data were indexed and scaled in HKL2000(2). Resolution cutoffs were chosen as  $CC1/2 \sim 0.8$ , which agrees with decrement of signal-to-noise ratio and  $R_{\text{sym}}$ . Data for the native crystal, the pyruvate soaked crystals and the CoA cocrystal extended to 2.60- $\text{\AA}$ , 3.00- $\text{\AA}$ , 3.20- $\text{\AA}$ , and 3.30- $\text{\AA}$  resolution, respectively.

**Structure determination and refinement.** The structure of native *Mt*PFOR was determined to 2.60- $\text{\AA}$  resolution by molecular replacement (MR) using Phaser(3) implemented in Phenix(4). The *Da*PFOR model (PDB ID: 2C42(5)), which shares more than 60% sequence identity with *Mt*PFOR, was trimmed with the Sculptor(6) algorithm implemented in Phenix(4) as the MR search model. The occupancy of TPP and [4Fe-4S] clusters were set to zero for MR search. The MR result gave a single solution of three copies of PFOR homodimer per asymmetric unit (ASU) with a log-likelihood gain (LLG) value of 18300 and a z-score of 114. One round of rigid-body refinement and simulated annealing was performed after MR, with initial  $R_{\text{work}}/R_{\text{free}} = 35\%/39\%$ . The atomic coordinates and B-factors was iteratively refined in Phenix Refine(4) with model building and manual adjustment of model in Coot(7). Water molecules were added manually throughout real space refinements using Fo-Fc electron density contoured to  $3.0\sigma$  as criteria. Non-crystallographic symmetry (NCS) restraints were used throughout refinement. Restraints for [4Fe-4S] clusters were based on *M. thermoacetica* carbon monoxide dehydrogenase/acetyl-CoA synthase (PDB ID: 3I01(8)). Restraints for TPP were based on the crystal structure of *Saccharomyces cerevisiae* pyruvate decarboxylase (PDB ID: 2VK8(9)). Final cycles of refinements include TLS parameterizations with three TLS groups per monomer, domain I-II, domain III, and domain IV-VI. The division of TLS groups is assigned to capture the flexible nature of domain III. The final model of the native structure contains residues listed in Table S2, one TPP per chain, and three [4Fe-4S]

clusters per chain.

Two structures of pyruvate-soaked *Mt*PFOR and one of *Mt*PFOR co-crystallized with CoA were determined to 3.00-Å, 3.20-Å, and 3.30-Å resolution by MR, respectively. The structure of native *Mt*PFOR was used as the MR search model in all cases. The MR results gave three dimers of PFOR per ASU in pyruvate-soaked *Mt*PFOR and three monomers of PFOR per ASU in CoA-cocrystallized *Mt*PFOR. In the latter case, two of the three monomers form a homodimer within the ASU, and the other monomer forms a homodimer with a monomer in a neighboring ASU across a crystallographic symmetry axis. The refinement protocol used was the same as for the native structure described above. However, additional restraints for CoA and the TPP adduct observed were required. In particular, restraints for CoA were based on the crystal structure of *Escherichia coli* acetyltransferase MccE (PDB ID: 3R9F(10)). Restraints for acetyl-TPP adduct and lactyl group of lactyl-TPP intermediate were generated from geometry optimizations followed by frequency calculations of 2-acetyl-3,4,5-trimethylthiazol-3-ium and 2-hydroxyl-2-methylpropanoate using B3LYP/6-311++G(11-13) with Gaussian 03(14). The calculated bond distances and angles for lactyl-TPP intermediate and acetyl-TPP adduct were used to update TPP restraints. The C2 of pyruvate in lactyl-TPP intermediate are restrained to be coplanar with the thiazolium ring. The carboxylic acid group and C2 of pyruvate in lactyl-TPP adduct are restrained to be planar. The acetyl group in acetyl-TPP adduct was restrained to be coplanar with the thiazolium ring. The final models contain three [4Fe-4S] clusters and one TPP or TPP adducts in each monomer. The model of PFOR cocrystallized with CoA contains one CoA molecule in each monomer. The detailed residue and TPP/TPP adduct composition is in Table S1 and S2.

Composite-omit electron density maps were calculated using Phenix(4) and used to verify all three models. All structure figures and solvent accessible surface area of proximal [4Fe-4S] clusters were rendered in PyMOL. Software used to process crystallography datasets was provided by SBGrid(15).

**Activity Assays with PFOR crystals.** Native PFOR crystals were grown to  $\sim 100 \times 20 \times 5 \mu\text{m}^3$  as described above, washed sequentially in two 2- $\mu\text{L}$  of the crystallization well solution, and added to 2- $\mu\text{L}$  of assay solution. Assay solution consisted of 50 mM HEPES 8.0, 10 mM oxidized methyl viologen, and a combination of reagents as follows: Drop 1 of **Figure S6**– 5 mM pyruvate and 5 mM CoA (no crystal); Drop 2 – 5 mM CoA and

one crystal (no pyruvate), Drop 3 – 5 mM pyruvate and one crystal (no pyruvate); Drop 4 – 5 mM pyruvate, 5 mM CoA, and one crystal. Drops were sealed and reagents were allowed to incubate. Photos of drops were taken after 15 min and 12 hrs. After 12 hr, 1  $\mu$ L of 5 mM CoA was added to each drop and incubated for another 15 mins before the third photo was taken.

**Multisequence alignment.** Selection of representative sequences was described previously (16). Sequences of OORs, which do not bind CoA, were not included and sequences of *St*OFORs, which were not considered previously (16), were added. The alignment was performed using PROMAL3D(17). For sequences in which “domain III” is not the first domain of a protein chain, residues prior to domain III were manually removed before alignment to increase alignment quality. The full alignment is shown in Table S3. The UniProt IDs of sequences chosen and alignment results are shown in Table S4.

## SI Appendix – Figures

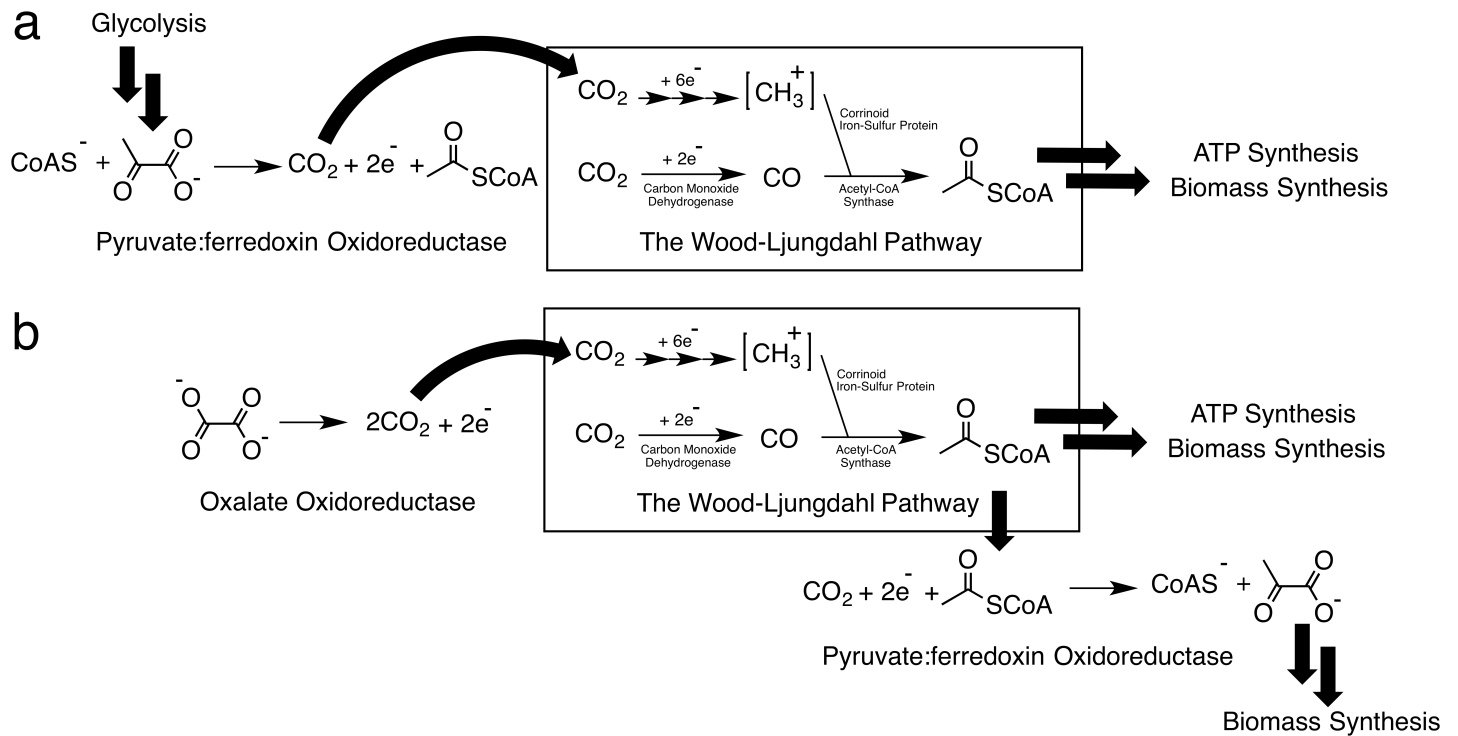

**Figure S1. Relationships of PFOR and OOR to the Wood-Ljungdahl pathway.** (a) Pyruvate from glycolysis is cleaved by PFOR, and the products can feed into the Wood-Ljungdahl pathway under certain cellular conditions. (b) OOR cleaves oxalate, generating both carbon dioxide and electrons for the Wood-Ljungdahl pathway. PFOR can convert the acetyl-CoA that is produced by the Wood-Ljungdahl pathway into pyruvate.

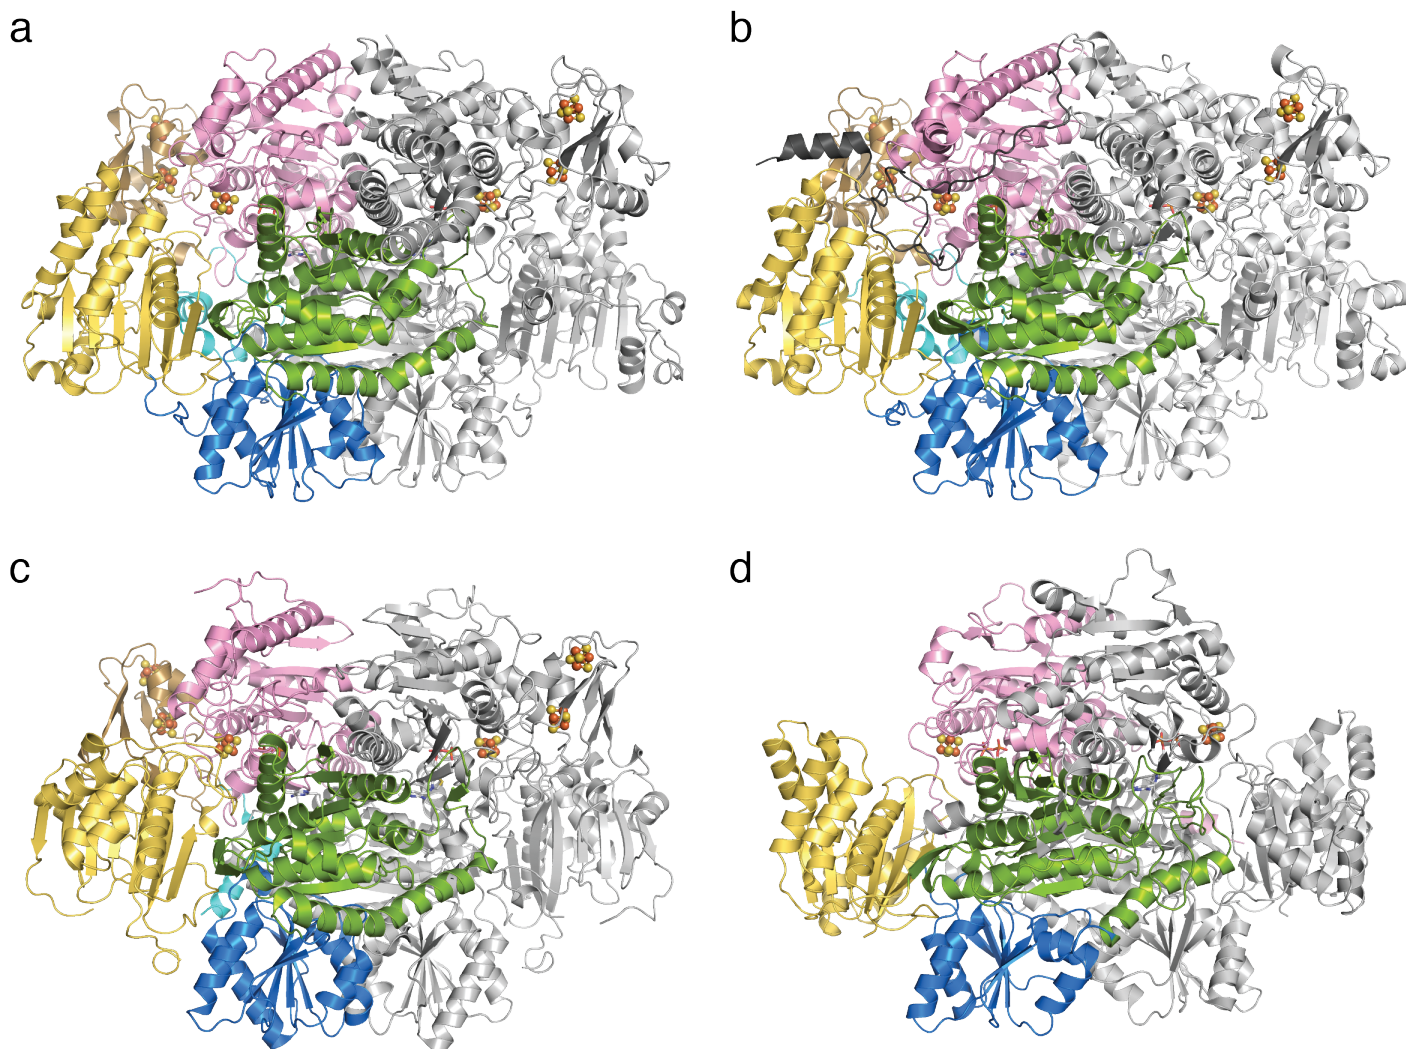

**Figure S2. Overall OFOR structures.** (a) *MtPFOR* (b) *DaPFOR* (PDB ID: 2C3M(5)) (c) *MtOOR* (PDB ID: 5C4I(18)) (d) *StOFOR2* (PDB ID: 5B46(19)) Both *MtPFOR* and *DaPFOR* are  $\alpha_2$  homodimers and are very similar in terms of overall structure. One difference is that domain VII is only found in OFORs from the *Desulfovibrio* genus. *MtOOR* is a  $(\alpha\gamma\beta)_2$  dimer of heterotrimers. Both structurally characterized *StOFORs* are dimers of heterodimers  $(\alpha\beta)_2$  in which chain  $\alpha$  contains domains I, II, and III, but the order of the domains with respect to the primary sequence is domain III-I-II from N-terminus to C-terminus. Color schemes and domain arrangements are in **Figure 2A**; domain VII of *DaPFOR* is shown as black ribbons.

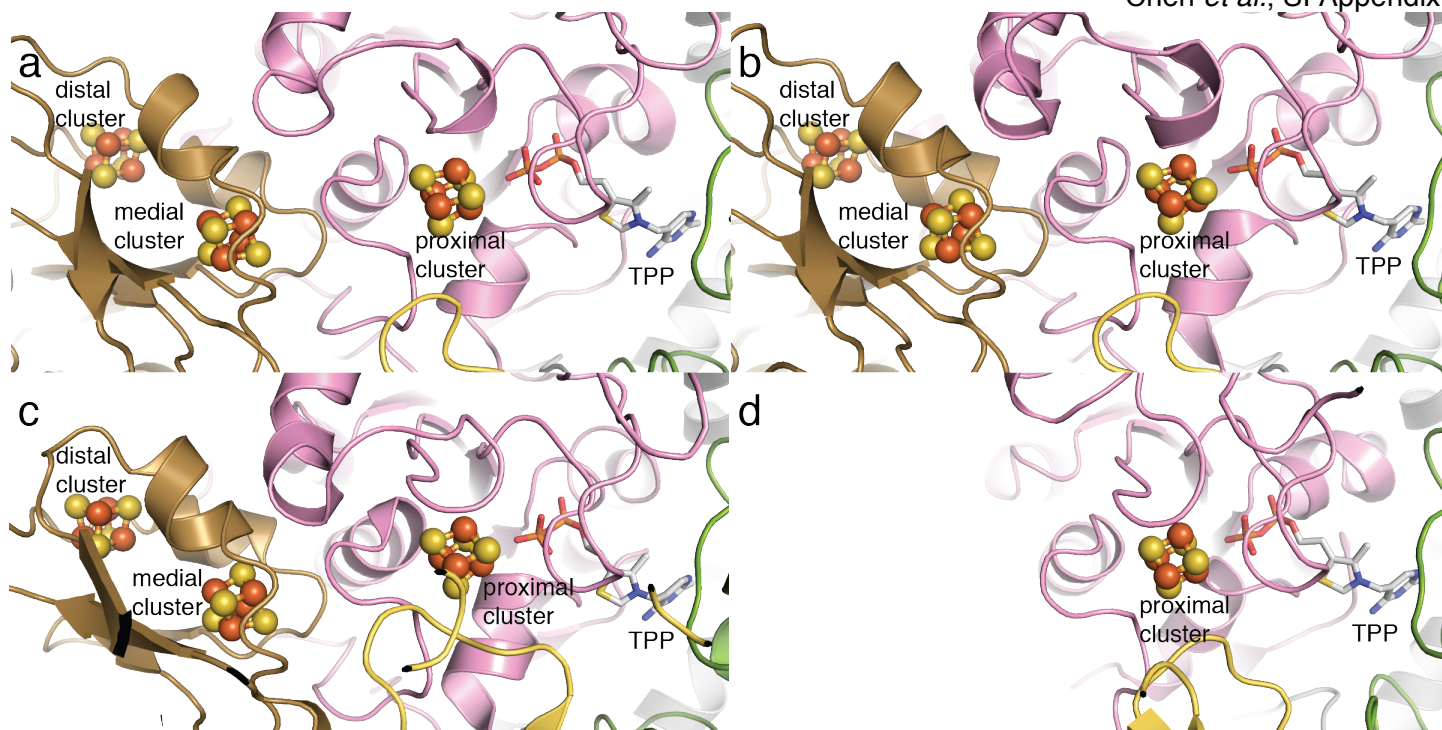

**Figure S3. The redox active cofactors are oriented similarly.** (a) *MtPFOR* (b) *DaPFOR* (PDB ID: 2C3M(5)) (c) *MtOOR* (PDB ID: 5C4I(18)) (d) *StOFOR2* (PDB ID: 5B46(19)). Despite the differences in functions and oligomeric states, each catalytic unit adapts a similar fold that binds one [4Fe-4S] cluster and one TPP through domain VI and two [4Fe-4S] clusters in domain V. *StOFORs* lack domain V, but TPP and the only enzyme-bound [4Fe-4S] cluster are arranged in a similar orientation with respect to the other OFORs. TPP molecules are drawn in sticks. [4Fe-4S] clusters are drawn in ball-and-stick representations. Domain I, III, V and VI of each protein) are shown as ribbons in the same color scheme as **Figure 2a**.



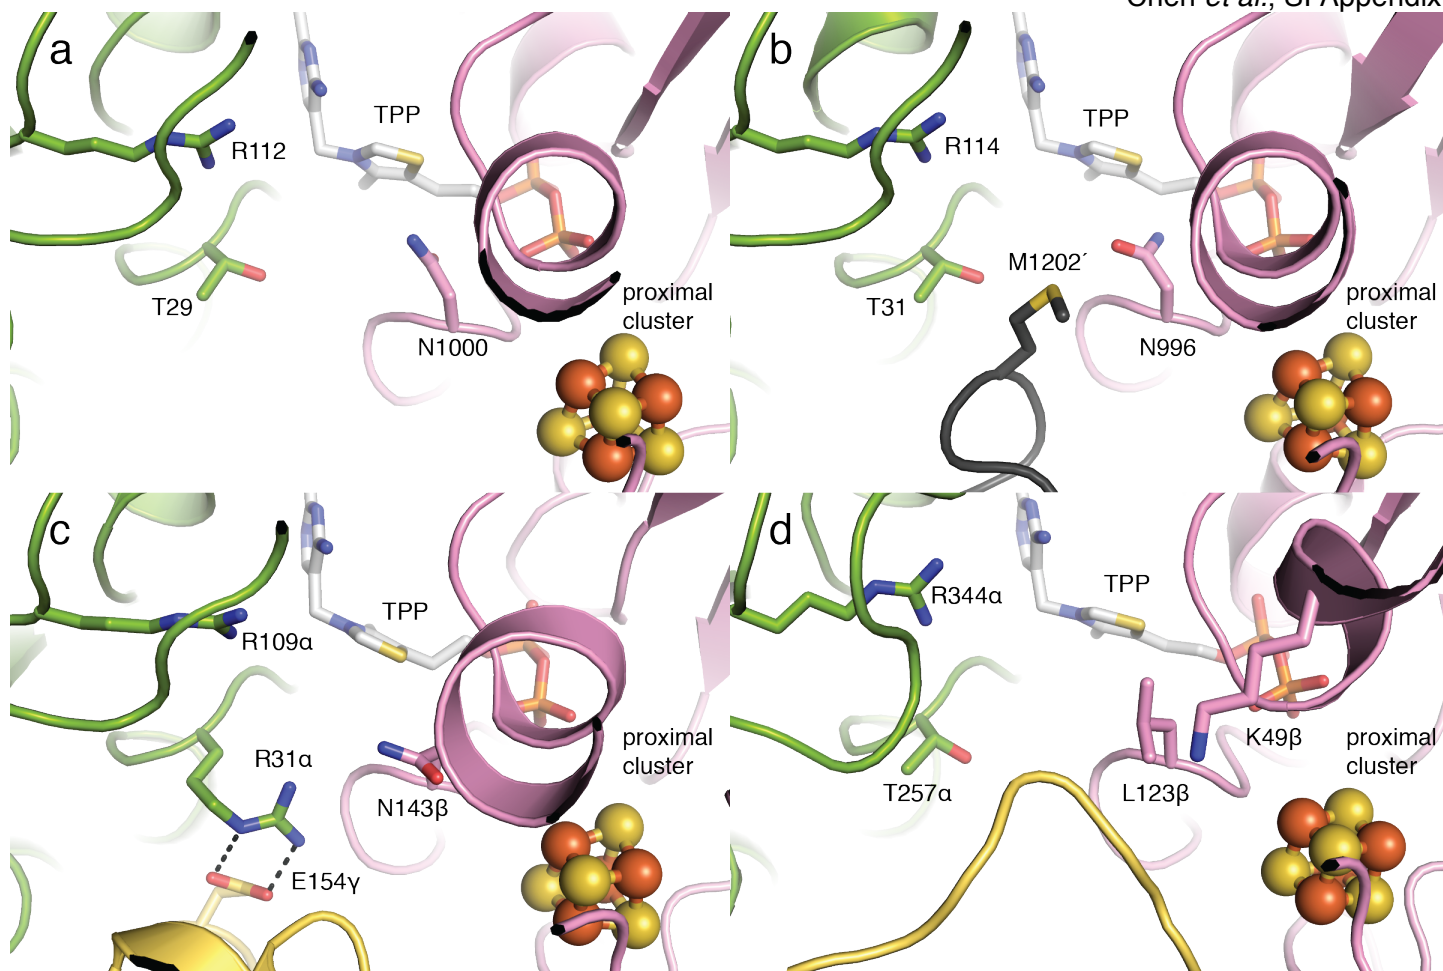

**Figure S4. Active site residues in OFOR enzymes.** (a) *MtPFOR* (b) *DaPFOR* (PDB ID: 2C3M(5)) (c) *MtOOR* (PDB ID: 5C4I(18)) (d) *StOFOR2* (PDB ID: 5B46(19)). The active site residues are conserved between *MtPFOR* and *DaPFOR* except for Met1202', which belongs to *DaPFOR*'s domain VII. Met1202' plugs the active site, and thus pyruvate-binding residues are not solvent accessible in the crystal structure of *DaPFOR*. Active site residues in *MtOOR* are similar to what is found in PFORs except Arg31 $\alpha$  replaces Thr29 (*MtPFOR* numbering). The difference affords a more electrostatic positive active site to bind oxalate, a dicarboxylic acid. The active site of *StOFOR* is larger than the other structurally characterized OFORs and contains two positively charged residues, Arg334 $\alpha$  and Lys49 $\beta$ . The figures are in the same orientation as **Figure 4E**. Domain I, III and VI of each protein are shown as ribbons in the same color scheme as **Figure 2A**; domain VII of *DaPFOR* is shown as black ribbons. Active site residues and TPP molecules are drawn in sticks. [4Fe-4S] clusters are drawn in ball-and-stick representations.

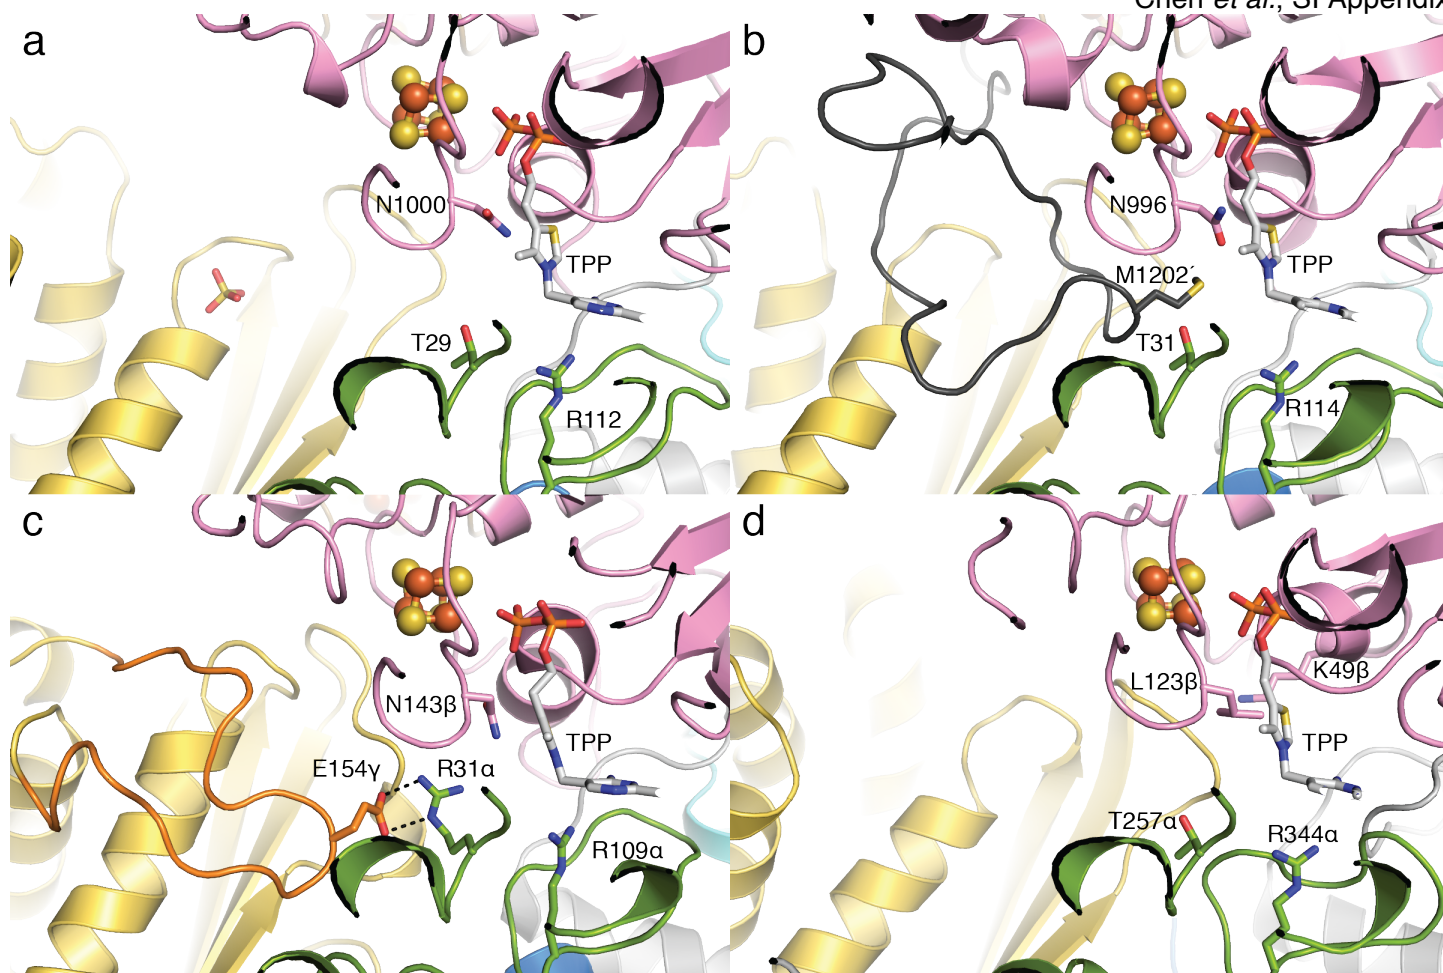

**Figure S5. Differences in active site accessibility in OFORs.** (a) The active site of *MtPFOR* is open. Thr29 and Asn1000, which were identified as pyruvate-binding residues are solvent accessible. (b) The active site of *DaPFOR* (PDB ID: 2C3M(5)) is blocked by domain VII (black) from the other monomeric subunit of the homodimer in the crystal structure. (c) The active site of *MtOOR* in the resting state (PDB ID: 5C4I(18)) is blocked by an extension from domain III referred to as the plug loop (orange). (d) The active site of *StOFOR2* (PDB ID: 5B46(19)) is open. The figures are in the same orientation as **Figure 4A**. Domain I, III and VI of each protein are shown as ribbons in the same color scheme as **Figure 2A**. Active site residues and TPP molecules are drawn in sticks. [4Fe-4S] clusters are drawn in ball-and-stick representations.

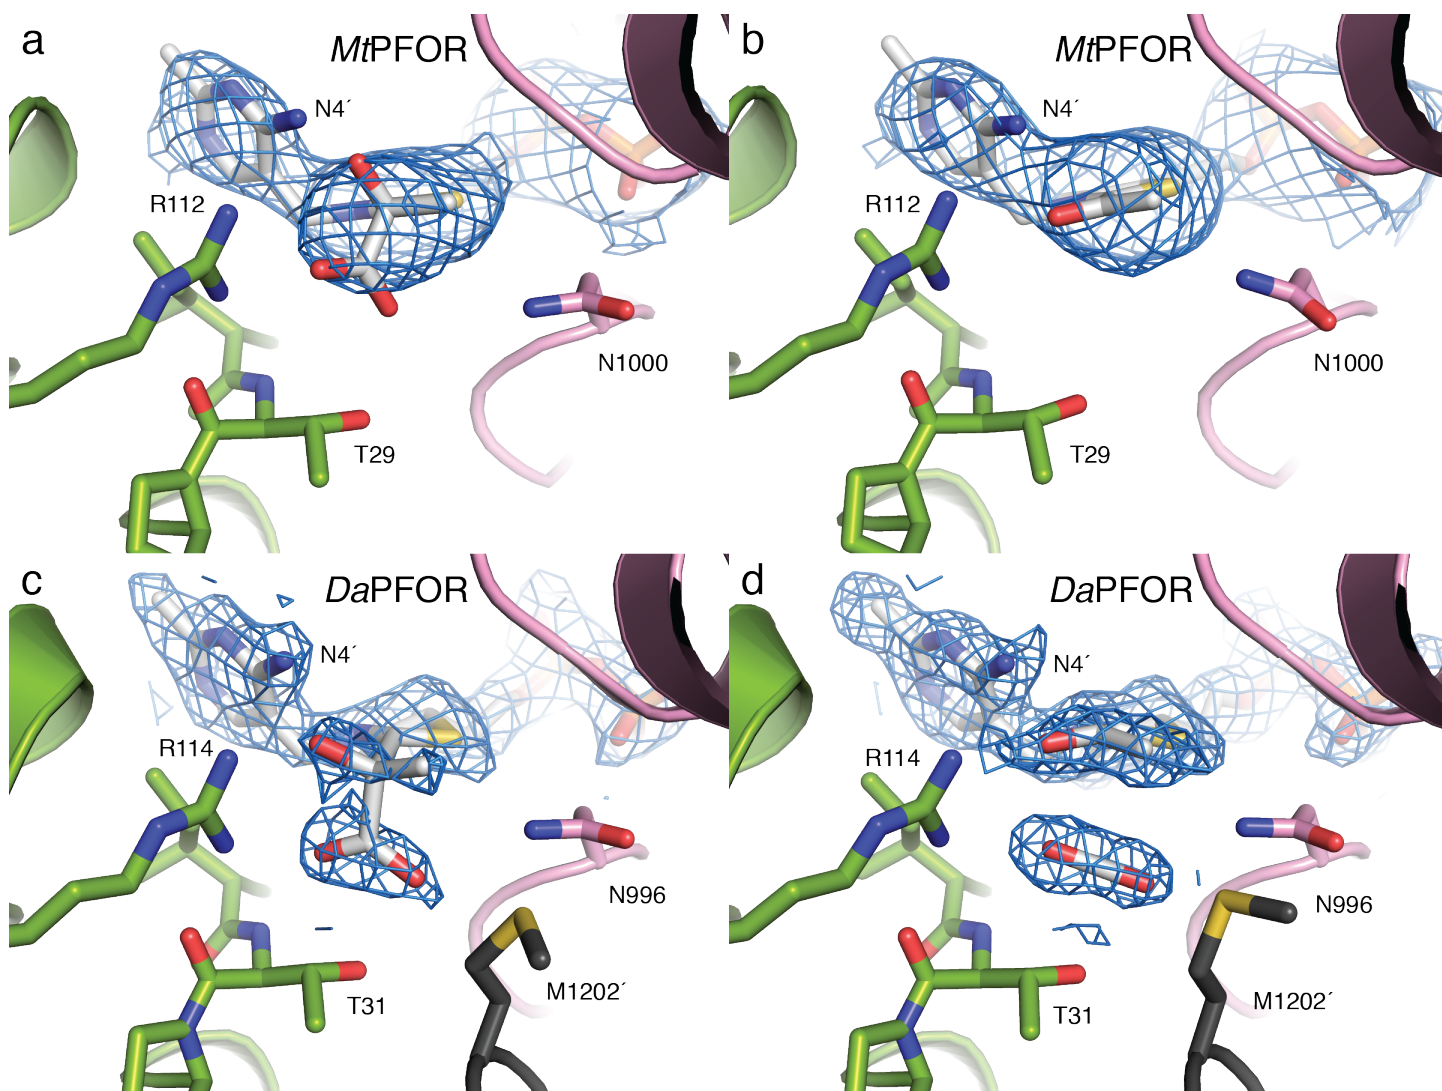

**Figure S6. The electron density of lactyl-TPP intermediates and acetyl-TPP adduct observed in *MtPFOR* and *DaPFOR*.** (a) Composite-omit electron density map contoured to  $1.0 \sigma$  in blue mesh for *MtPFOR* soaked with pyruvate for 15-min. Lactyl-TPP intermediate state is modeled in the electron density. Four of six active sites in the asymmetric unit (ASU) show omit map density indicative of adduct formation. (b) Composite-omit electron density map contoured to  $1.0 \sigma$  in blue mesh for *MtPFOR* soaked with pyruvate for 12-hr. An acetyl-TPP adduct is modeled in the electron density. Density for an acetyl-TPP adduct is present in all six active sites in ASU. (c) 2Fo-Fc electron density map contoured to  $1.0 \sigma$  is shown for lactyl-TPP intermediate state in *DaPFOR* (PDB ID: 2C3P(5)). The carbon-carbon bond between C2 carbon of TPP and the lactyl moiety is long at 1.9-Å. (d) 2Fo-Fc electron density map contoured to  $1.0 \sigma$  for acetyl-TPP intermediate in *DaPFOR* (PDB ID: 2C3Y(5)). Carbon dioxide are refined into density near the acetyl-TPP adduct.

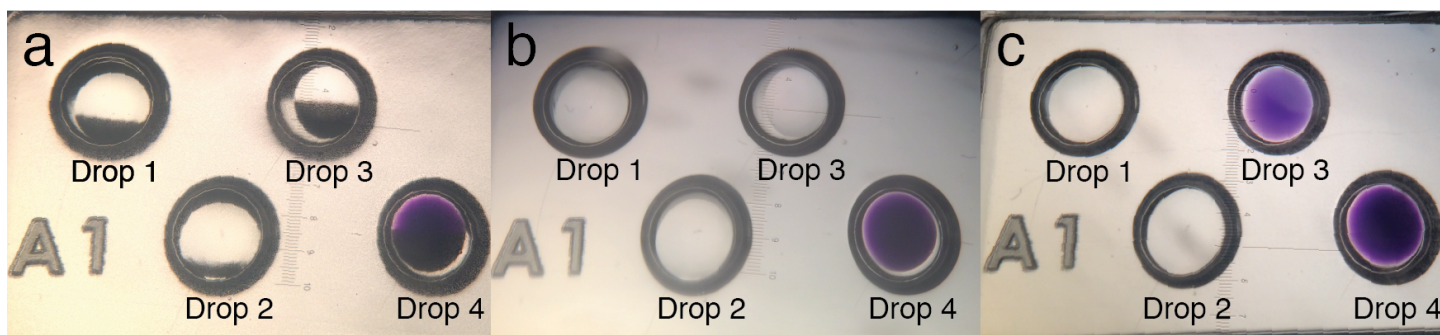

**Figure S7. Crystallized PFOR retains pyruvate oxidation activity.** Each 2-  $\mu\text{L}$  drop contains 50 mM HEPES pH 8.0, 10 mM oxidized methylviologen (MV) and a combination of substrates as follows: Drop 1 – negative control drop (no crystal) containing 5 mM CoA and 5 mM pyruvate; Drop 2 – negative control drop (no pyruvate) containing one crystal and 5 mM CoA; Drop 3 – negative control drop (no CoA) containing one crystal and 5 mM pyruvate; Drop 4 – one crystal, 5 mM CoA and 5 mM pyruvate. Crystals were looped and washed, before being added into each drop. (a) Results of 15 min incubation. MV is reduced in drop 4 turning the solution purple, but not in the negative control drops (1-3) (b) Results of 12 hr incubation. No MV reduction is observed in control drops (1-3). (c) Following a 12 hr incubation, 1  $\mu\text{L}$  of 5 mM CoA was added into each drop and allowed to incubate for 15 min. With the addition of CoA to all drops, Drop 3 (the no CoA control) now turns purple.

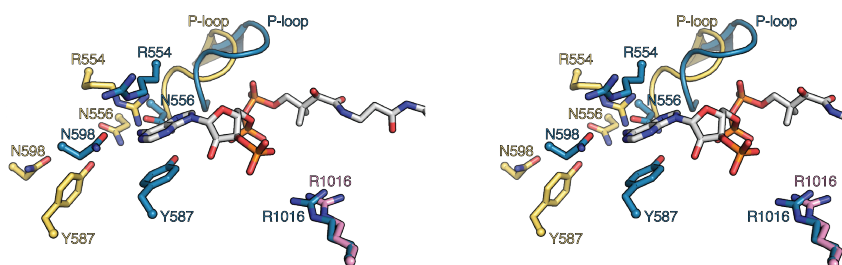

**Figure S8. Stereo view showing that residues that contact CoA are not pre-organized for CoA binding.** Adenine binding residues (sticks) and P-loop (ribbons) adopt different conformations with CoA (teal) and without (yellow). Movement of domain III also brings 3'-phospho group of CoA toward Arg1016 (without CoA – pink; with CoA – teal). Cas are labeled as spheres.

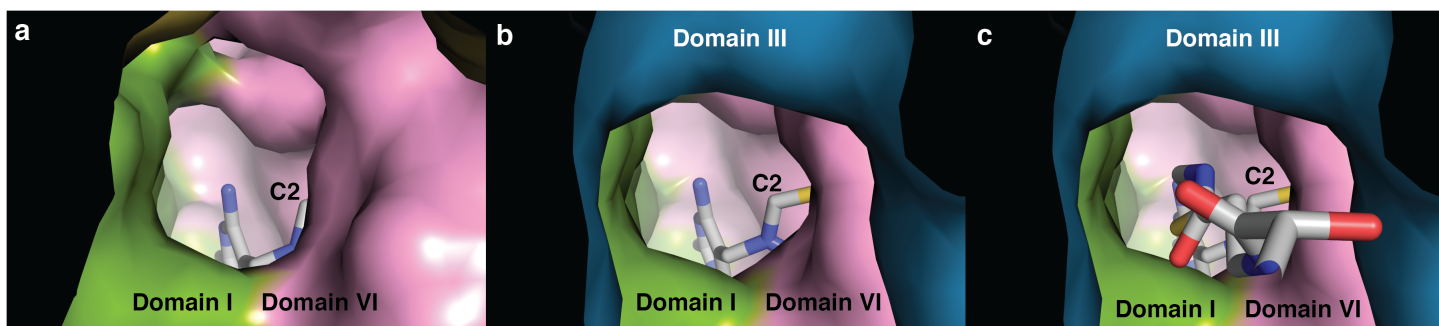

**Figure S9. Surface representations of the *MtPFOR* active site in different liganded states.** (a) Channel to TPP is open in the CoA-free structure of *MtPFOR*. (b) Channel to TPP is narrower in the CoA-bound structure of *MtPFOR* due to movement of domain III (teal surface). CoA is omitted for clarity. (c) CoA-bound *MtPFOR* structure showing CoA filling the narrow channel to TPP, occluding the TPP from solvent. CoA and TPP are shown as sticks. Position C2 of TPP, which initiates the nucleophilic attack on pyruvate, is labeled. Domain I surface is in green, domain III in teal, and domain VI in pink.

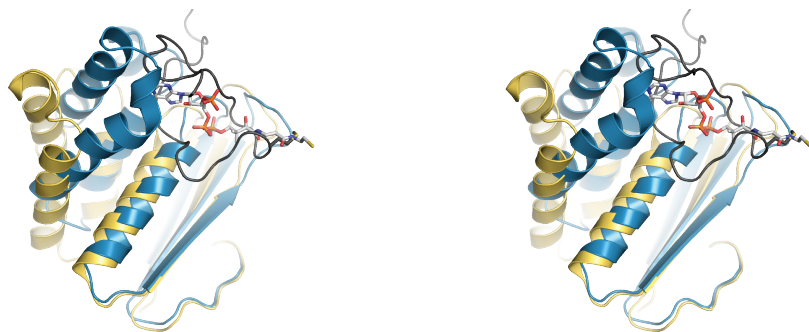

**Figure S10. Stereo view of domain III and VII of *DaPFOR* (PDB ID: 2C3M(5)) overlaid with domain III of *MtPFOR* from CoA-bound structure.** Domain VII of *DaPFOR* (black) occupies the space where CoA binds in *MtPFOR* and clashes with CoA-bound position of *MtPFOR*'s domain III. Domain III of *MtPFOR* with CoA bound is colored teal; domain III of *DaPFOR* is colored yellow.

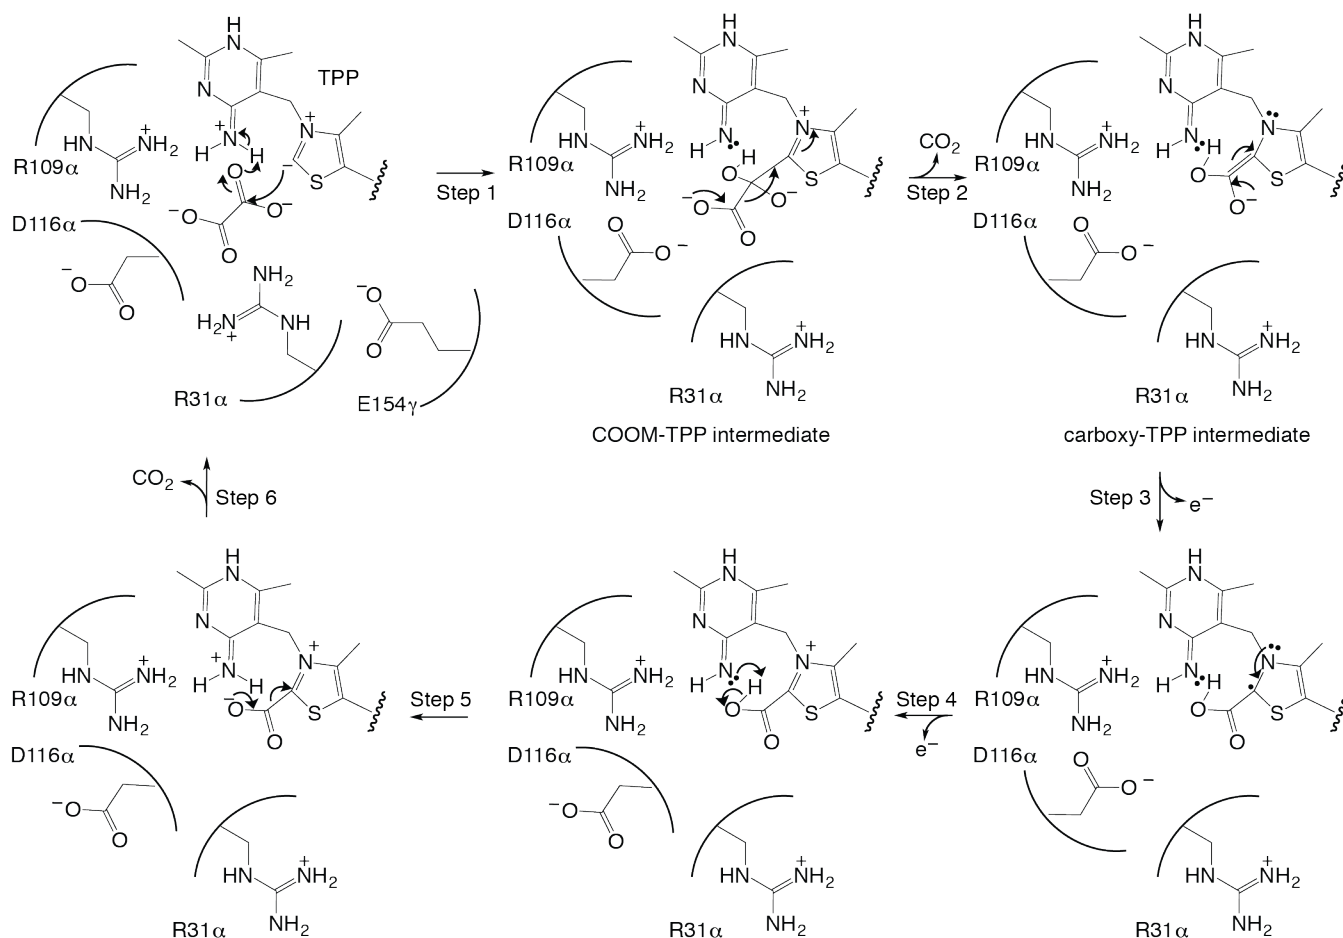

**Figure S11. A bait-and-switch mechanism proposed for OOR.** This mechanism for *Mt*OOR has been proposed based on structural snapshots of *Mt*OOR(18, 20) and computational studies of reaction intermediates (21-24). Active site residues Arg31 $\alpha$  and Arg109 $\alpha$  are proposed to activate oxalate, a dicarboxylic acid, for nucleophilic attack by the TPP, and protonation of the carboxy-di-oxido-methyl-TPP (COOM-TPP) is proposed to occur with the N4' of TPP acting as the catalytic acid (**step 1**). Asp116 $\alpha$ , which is part of a loop called the 'switch loop', is observed by crystallography to flip into the active site and point directly toward the COOM-TPP adduct, which is expected to facilitate decarboxylation through charge-charge repulsion (**step 2**). CO<sub>2</sub> release further requires movement of Arg31 $\alpha$  out of the active site, which additionally alters the active site electrostatic environment to be less positively charged. Arg31 $\alpha$  is not free to move, however, without the accompanying movement of domain III and the so-called plug loop that houses Glu154 $\gamma$ . The plug loop is named for the fact that it 'plugs' the active site burying the COOM-TPP adduct. The 'plugging' is secured by interaction between Glu154 $\gamma$  and Arg31 $\alpha$ . Following decarboxylation, the first electron is transferred to a [4Fe-4S] cluster (**step 3**) and then the second electron is transferred (**step 4**). It has been proposed that the presence of negatively charged Asp116 $\alpha$  in the active site facilitates these oxidations through charge repulsion (20). In the last step before release of the second CO<sub>2</sub> (**step 5**), Asp116 $\alpha$  has been proposed to flip back, away from the active site, consistent with one crystal structure of a carboxyl-TPP intermediate in *Mt*OOR. This loop rearrangement removes the negative charge next to the carboxyl-TPP, thus facilitating deprotonation of the carboxylate and CO<sub>2</sub> release (**step 6**).

## SI Appendix – Tables

Table S1. Data collection and model refinement statistics of *MtPFOR*

| PDB ID                                        | Native<br>6CIN                                    | Pyruvate soaked<br>(15 mins)<br>6CIO              | Pyruvate soaked<br>(12 hrs)<br>6CIP               | CoA cocrystallization<br>(10 mM)<br>6CIQ          |
|-----------------------------------------------|---------------------------------------------------|---------------------------------------------------|---------------------------------------------------|---------------------------------------------------|
| Beamline                                      | APS 24-ID-C                                       | APS 24-ID-C                                       | APS 24-ID-C                                       | APS 24-ID-C                                       |
| Space group                                   | C2                                                | C2                                                | C2                                                | C2                                                |
| Cell dimensions (Å)                           | a=340.61, b=106.63,<br>c=239.08, $\beta$ =109.31° | a=340.39, b=107.10,<br>c=239.56, $\beta$ =109.67° | a=342.01, b=108.26,<br>c=240.44, $\beta$ =109.32° | a=337.71, b=106.99,<br>c=120.47, $\beta$ =109.85° |
| Wavelength (Å)                                | 0.9791                                            | 0.9791                                            | 0.9789                                            | 0.9789                                            |
| Resolution (Å)                                | 100.-2.60 (2.64-2.60)                             | 50.-3.00 (3.11-3.00)                              | 100.-3.20 (3.26-3.20)                             | 100.-3.30 (3.36-3.30)                             |
| # unique reflections                          | 247841                                            | 157684                                            | 133390                                            | 58817                                             |
| Completeness (%)                              | 98.5 (95.7)                                       | 97.4 (92.6)                                       | 97.1 (84.9)                                       | 97.3 (83.0)                                       |
| Redundancy                                    | 3.3 (3.0)                                         | 4.9 (4.1)                                         | 3.3 (2.7)                                         | 3.5 (2.7)                                         |
| $\langle I/\sigma \rangle$                    | 9.4 (2.1)                                         | 7.2 (1.7)                                         | 7.4 (1.5)                                         | 6.1 (2.1)                                         |
| R <sub>sym</sub>                              | 0.075 (0.582)                                     | 0.160 (0.793)                                     | 0.092 (0.580)                                     | 0.159 (0.454)                                     |
| CC <sub>1/2</sub>                             | (0.796)                                           | (0.781)                                           | (0.836)                                           | (0.798)                                           |
| Resolution (Å)                                | 89.0 - 2.60                                       | 48.5 - 3.00                                       | 97.5 - 3.20                                       | 80.3 - 3.30                                       |
| # unique reflections                          | 244551                                            | 157125                                            | 132694                                            | 58800                                             |
| R <sub>work</sub> (%) / R <sub>free</sub> (%) | 19.5/22.7                                         | 20.7/24.1                                         | 18.7/22.5                                         | 18.4/22.3                                         |
| RMS bond lengths (Å)                          | 0.003                                             | 0.003                                             | 0.003                                             | 0.003                                             |
| RMS bond angles (°)                           | 0.561                                             | 0.554                                             | 0.550                                             | 0.566                                             |
| Number of<br>Atoms/Molecules                  |                                                   |                                                   |                                                   |                                                   |
| Protein atoms                                 | 53090                                             | 53163                                             | 52606                                             | 26589                                             |
| TPP                                           | 6                                                 | 2                                                 | 0                                                 | 3                                                 |
| Lactyl-TPP                                    | 0                                                 | 4                                                 | 0                                                 | 0                                                 |
| Acetyl-TPP                                    | 0                                                 | 0                                                 | 6                                                 | 0                                                 |
| [4Fe-4S] clusters                             | 18                                                | 18                                                | 18                                                | 9                                                 |
| CoA molecules                                 | 0                                                 | 0                                                 | 0                                                 | 3                                                 |
| Water molecules                               | 439                                               | 54                                                | 27                                                | 29                                                |
| Average B-factor (Å <sup>2</sup> )            | 77.5                                              | 75.3                                              | 103.4                                             | 95.0                                              |
| Protein chains                                | 77.7                                              | 75.5                                              | 103.5                                             | 95.0                                              |
| TPP                                           | 68.9                                              | 69.0                                              | n/a                                               | 66.7                                              |
| Lactyl-TPP                                    | n/a                                               | 61.1                                              | n/a                                               | n/a                                               |
| Acetyl-TPP                                    | n/a                                               | n/a                                               | 89.9                                              | n/a                                               |
| [4Fe-4S] clusters                             | 88.4                                              | 86.5                                              | 112.1                                             | 95.3                                              |
| CoA molecules                                 | n/a                                               | n/a                                               | n/a                                               | 127.1                                             |
| Water molecules                               | 51.3                                              | 36.5                                              | 57.1                                              | 40.1                                              |
| Ramachandran plot                             |                                                   |                                                   |                                                   |                                                   |
| Favored (%)                                   | 98.45                                             | 98.40                                             | 98.31                                             | 97.93                                             |
| Allowed (%)                                   | 1.55                                              | 1.60                                              | 1.69                                              | 2.07                                              |
| Outliers (%)                                  | 0.00                                              | 0.00                                              | 0.00                                              | 0.00                                              |
| Rotamer outliers (%)                          | 0.37                                              | 0.42                                              | 0.41                                              | 0.40                                              |

**Table S2. Residues and cofactors modeled in each chain of all four structures.**

|                                  | Chain                                                |                                                       |                                                       |                                                                |                                                           |                                                                |
|----------------------------------|------------------------------------------------------|-------------------------------------------------------|-------------------------------------------------------|----------------------------------------------------------------|-----------------------------------------------------------|----------------------------------------------------------------|
|                                  | A                                                    | B                                                     | C                                                     | D                                                              | E                                                         | F                                                              |
| Native                           | 2-1140,<br>1147-1170,<br>3 [4Fe-4S],<br>1 TPP        | 2-1170,<br>3 [4Fe-4S],<br>1 TPP                       | 2-623,<br>630-1170,<br>3 [4Fe-4S],<br>1 TPP           | 3-586,<br>592-622,<br>629-1170,<br>3 [4Fe-4S],<br>1 TPP        | 2-625,<br>630-1170,<br>3 [4Fe-4S],<br>1 TPP               | 3-586,<br>597-1170,<br>3 [4Fe-4S],<br>1 TPP                    |
| Pyruvate<br>soaking<br>(15 mins) | 2-1140,<br>1146-1170,<br>3 [4Fe-4S],<br>1 lactyl-TPP | 2-1140,<br>1146-1170,<br>3 [4Fe-4S],<br>1 TPP         | 2-623,<br>632-1170,<br>3 [4Fe-4S],<br>1 lactyl-TPP    | 2-587,<br>594-624,<br>629-1170,<br>3 [4Fe-4S],<br>1 lactyl-TPP | 2-622,<br>632-1142,<br>1146-1170,<br>3 [4Fe-4S],<br>1 TPP | 2-587,<br>594-622,<br>631-1170,<br>3 [4Fe-4S],<br>1 lactyl-TPP |
| Pyruvate<br>soaking<br>(12 hrs)  | 2-1140,<br>1145-1170,<br>3 [4Fe-4S],<br>1 acetyl-TPP | 2-1140,<br>1145-1170,<br>3 [4Fe-4S],<br>1 acetyl-TPP  | 2-623,<br>630-1170,<br>3 [4Fe-4S],<br>1 acetyl-TPP    | 2-624,<br>630-1170,<br>3 [4Fe-4S],<br>1 acetyl-TPP             | 2-624,<br>630-1170,<br>3 [4Fe-4S],<br>1 acetyl-TPP        | 2-1170,<br>3 [4Fe-4S],<br>1 acetyl-TPP                         |
| CoA<br>cocrySTALLIZATION         | 2-1170,<br>3 [4Fe-4S],<br>1 TPP,<br>1 CoA            | 2-624,<br>628-1170,<br>3 [4Fe-4S],<br>1 TPP,<br>1 CoA | 2-622,<br>631-1170,<br>3 [4Fe-4S],<br>1 TPP,<br>1 CoA | N/A                                                            | N/A                                                       | N/A                                                            |



**Table S3. Sequence alignments of domain IIIs of CoA-dependent OFORs.** The sequences are arranged in the same order as Table S4.

| Conservation:             |     | 8                        | 6                                       | 6                     | 9                              |     |
|---------------------------|-----|--------------------------|-----------------------------------------|-----------------------|--------------------------------|-----|
| sp_005650_PORC_THEME_Pyru | 1   | -----MPVAKKYFEIRWH       | GRAGQG                                  | AKSASQMLAEAA          | LEAGKYVQAFPEYGAE               | 48  |
| tr_M3NSB1_M3NSB1_HELFX_Py | 1   | -----MFQIRWH             | ARAGQG                                  | AITGAKGLADVI          | -SKTGKEVQAFASYGSAK             | 42  |
| tr_Q3Z8I7_Q3Z8I7_DEHM1_Py | 1   | -----MKHFIEIRWH          | GRGGQG                                  | AVTSAELIAQAA          | -IGKGYAQAFPSFGPER              | 45  |
| sp_P80523_PORC_METBF_Pyru | 1   | -----MKEIRIH             | GRGGQG                                  | SVTAAEMLSVAA          | -FEDGKFSQAFPAFGVER             | 42  |
| sp_P80902_PORC_METTM_Pyru | 1   | -----MIEIRFH             | GRGGQG                                  | AVTAAEILAKAA          | -FEDGKYSQAFPPFGVER             | 42  |
| tr_W8CQB1_W8CQB1_9EURY_Py | 1   | -----MIEIRFH             | GRGGQG                                  | AVTAAANILAEAA         | -FLEGKYVQAFPPFGVER             | 42  |
| tr_Q4KY23_Q4KY23_TRIVA_Py | 411 | -----PEGTKQCMFW          | GLGSDG                                  | TVGANKQAIKILVSN       | TKLYGQAYFAYDAHK                | 456 |
| sp_P94692_POR_DESAP_Pyruv | 414 | -----PKGTIQCFW           | GLGADG                                  | TVGANKQAIKII          | GDNTDLFAQGYFYSYDSK             | 459 |
| tr_Q2RMD6_Q2RMD6_MOOTA_Py | 411 | -----PKGTFRCKFF          | GLGSDG                                  | TVGANKNSIKII          | GDHTDMAQGYFVYDSK               | 456 |
| tr_C4LTX6_C4LTX6_ENTHI_Py | 409 | -----PEGTTQCMFW          | GLGSDG                                  | TVGANHDAIRII          | QNTDMYVQGYFYSYDAHK             | 454 |
| sp_Q968X7_PNO_CRYPV_Pyruv | 417 | -----TSETKQCLFW          | GLGSDG                                  | TVSANKNAIKII          | GESTDLQVQGYFAYDAK              | 462 |
| sp_Q94IN5_PNO_EUGGR_Pyruv | 480 | -----PEGTRQCVFW          | GLGSDG                                  | TVGANRSAVRII          | GDNSDLMVQAYFQFADF              | 525 |
| tr_L8B958_L8B958_CHLRE_Py | 522 | -----PKGTFCFLFWS         | GLGSDG                                  | TVGANKEAIKII          | ASSAGMSAQYFYSYDAHK             | 567 |
| sp_Q53046_NIFJ_RHORT_Pyru | 422 | -----SADIKRSVFF          | GLGADG                                  | TVGANKNSIKII          | SDSPTIHGQGYFVYDSK              | 467 |
| tr_B5XPH3_B5XPH3_KLEP3_Py | 414 | -----HAGITACKFW          | MGSDG                                   | TVGANKSAIKII          | GDNTPLYAQYFYSYDSK              | 459 |
| tr_Q24982_Q24982_GIAIN_Py | 437 | -----PEGTTECILW          | GLGSDG                                  | TIGACRNAMEKIL         | SDRVGCEQANFEPDGGK              | 482 |
| tr_I2K9Y6_I2K9Y6_9PROT_Py | 1   | -----MAEQKKKERYNIRIS     | GLGGQG                                  | VVTTAHLGSTM           | -DNAGKYASLVPPFGSEK             | 50  |
| tr_O67231_O67231_AQUAE_Fe | 1   | -----M                   | -KRYNIRIAG                              | VGGQG                 | VVTSAHIGNAM-AAAGKYASLVPPFGSEK  | 44  |
| tr_I0IRW0_I0IRW0_LEPFC_Fe | 1   | -----MNKERYNIRMA         | GLGGQG                                  | VVTASHILSNM           | -VIMGGESLVPFFGSEK              | 46  |
| tr_J9ZD37_J9ZD37_LEPFM_Py | 1   | -----MSAMKRRINIRMS       | GLGGQG                                  | VVTSAHIMAMAA          | -SKEDKFSISNPPFGAEK             | 48  |
| tr_D3DJJ8_D3DJJ8_HYDTP_Py | 1   | -----MKRRRVNIRMP         | ALGGQG                                  | AVTAAHI IATAA         | -DYGYYAVSNPPFGAEK              | 46  |
| sp_P84820_PORC_THELN_Pyru | 1   | -----MIEIRFH             | GRGGQG                                  | AVTAAANILAEAA         | -FLEGKYVQAFPPFGVER             | 42  |
| sp_P80907_VORA_METTM_Keto | 290 | -----DDPEFREVVKIAG       | FPGGQG                                  | VLSMGLTLAQAA          | -CSEGRHTSWYPAYGPEQ             | 337 |
| tr_A1HTT9_A1HTT9_9FIRM_Py | 1   | -----MTHEIIMAG           | FPGGQG                                  | VMLMGQLVTTYAG         | -MIEGKQVSWIPSYGPEM             | 43  |
| tr_B0R3G0_B0R3G0_HALS3_Ox | 1   | -----MHDDLNWAIG          | GEAGDG                                  | IASTGKIFAQAL          | -SRAGRHVFTSKDFASRI             | 45  |
| tr_H3ZPH3_H3ZPH3_THELN_2- | 1   | -----MQIRLAG             | IGGGQG                                  | VVLAGIILGEAA          | -AIEGLNVIQTQDYGSSQ             | 41  |
| tr_Q1IQP1_Q1IQP1_KORVE_2- | 1   | -----MQRLQLTEIRIAG       | FPGGQG                                  | VILSAIVIGKAASILEGG    | FATMTQSFPEA                    | 48  |
| tr_E8RJ92_E8RJ92_DESPD_2- | 1   | -----MSKNAPSSQTEI        | IVTGF                                   | GGQG                  | IILAGRILGMAASLGDKKESTLVQAYGPES | 51  |
| sp_P80906_KORC_METTM_2-ox | 1   | -----MRKEIRIAG           | FPGGQG                                  | VILAGIVLGKAASLYDGLYAV | QTQSYGPEA                      | 44  |
| tr_O68230_O68230_HELFX_Oo | 1   | -----MEAQLRFTG           | VGGQG                                   | VLLAGEILAEAK          | -IASGGYGTKTSTYTSQV             | 43  |
| sp_O53182_KORA_MYCTU_2-ox | 1   | MDPNGSGAGPESHDAAFHAAPDRQ | LENVVIRFAG                              | DSGDG                 | MLTGDRTFSEA-ALFGNDLATQPNYPAEI  | 69  |
| tr_H0DIR4_H0DIR4_9STAP_2- | 1   | -----MNRQISWKVGG         | QQGEG                                   | IESTGEIFATAM          | -NRKGYLYGYRHFSSRI              | 45  |
| tr_O87870_O87870_THAAR_2- | 1   | -----MTARSVSI            | TFAGSGGAG                               | VMTAGSMLLDAA          | -GHAGWYAYMTRSSGAQI             | 46  |
| tr_B0R4X6_B0R4X6_HALS3_Py | 1   | -----MTDDELIWRIAG        | SGSDG                                   | IDSTSQNFAL            | -MRSGLDVFTTHRHYPSRI            | 46  |
| tr_D3DI99_D3DI99_HYDTP_2- | 1   | -----MAFDLTIKIG          | EGGEG                                   | VISAGDFL              | TESA-ARAGYYVNFKSFPAEI          | 45  |
| sp_O07836_IORB_THEKO_Indo | 1   | -----MKEYNIVITG          | VGGQG                                   | ILTAANLLGWAA          | -LRAGYKVRVGEVHGMSQ             | 44  |
| tr_A1RYA4_A1RYA4_THEPD_In | 1   | -----MAGKSIVIAG          | VGGQG                                   | LITIGTVVAQAL          | -IRKYSVRVGEVHGLSQ              | 44  |
| tr_K4MBD5_K4MBD5_9EURY_In | 1   | -----MSAPGISQFDVI        | IAGVGGQG                                | AILASDIIGKAA          | -VKENLSVRAAETHGMAQ             | 49  |
| sp_P80911_IORB_METTM_Indo | 1   | -----MSYNIYVC            | VGGQG                                   | IIKTSVIG              | IEAA-MNEGMMVVMSEIHGMAQ         | 43  |
| tr_P72578_P72578_SULSP_2- | 1   | -----MRLSWVIG            | GAQGTG                                  | IDTAANIFGNAV          | -ASAGYYIYGNREYYSNI             | 43  |
| tr_Q96Y66_Q96Y66_SULTO_2- | 1   | -----MRLSWVIG            | GAQGTG                                  | IDTAANIFGNAV          | -ASAGYYIYGNREYYSNI             | 43  |
| tr_Q96XT2_Q96XT2_SULTO_2- | 1   | -----MTRIVVMIG           | GAQGLG                                  | VDTSANIFGNAV          | -AKAGYYLFGNREYYSNI             | 44  |
| Consensus aa:             |     | .....                    | ph.h.G.ttpGh..hsp.h.phh....s.s....@ssp. |                       |                                |     |

Yellow – P-loop

Red – Positively changed residue predicted to be within hydrogen bond distance with the proximal [4Fe-4S] cluster

|                           |     |                                                                    |     |  |
|---------------------------|-----|--------------------------------------------------------------------|-----|--|
| Conservation:             | 6   | 6                                                                  | 6   |  |
| sp_005650_PORC_THEMA_Pyru | 49  | TG-----APMRAFNRIGDEYIRVRS--AVENPDVVVVVIDETLLSP-----AIVEGLSED       | 95  |  |
| tr_M3NSB1_M3NSB1_HELFX_Py | 43  | RG-----AAMMAYNRVDDEPILNHE--RFMQPDYVLVIDPGLVFIE-----NIFANEKED       | 90  |  |
| tr_Q3Z8I7_Q3Z8I7_DEHMI_Py | 46  | RG-----APVQSFNRISDDKPIRERSGISEPDIIVVLDPSLVIIIG-----NVISGLKEG       | 94  |  |
| sp_P80523_PORC_METBF_Pyru | 43  | RG-----APVQAFTRINNNPIRLRS--QVYTPDYVIVQDATTLETV-----DVASGVKDD       | 90  |  |
| sp_P80902_PORC_METTM_Pyru | 43  | RG-----APVMAFTRINDEPIRRRY--QVYNPDYVVVLDEGLVDVV-----DVFSGLKED       | 90  |  |
| tr_W8CQB1_W8CQB1_9EURY_Py | 43  | RG-----APVTAFTRIDEKPIRIKT--QIYEPDIVVVLDPSSLDTV-----DVTAGLKDG       | 90  |  |
| tr_Q4KY23_Q4KY23_TRIVA_Py | 457 | SG-----GVTTPHLRFGAKPINAPY--YVQNADYIACHNPSYLHKF-----DMTKQLKKG       | 504 |  |
| sp_P94692_POR_DESAF_Pyruv | 460 | SG-----GITISHLRFGEKPIQSTY--LVNRADYVACHNPAYVGIY-----DILEGIKDG       | 507 |  |
| tr_Q2RMD6_Q2RMD6_MOOTA_Py | 457 | SG-----GVTISHLRFGEKPIQSA--LIDQADLIACHNPSYVGRY-----NLLEGIKPG        | 504 |  |
| tr_C4LTX6_C4LTX6_ENTHI_Py | 455 | SG-----GVTVSHLRFGEKPIKSQY--LIDQADLIACHNPSYVGRY-----NLLEGIKPG       | 502 |  |
| sp_Q968X7_PNO_CRYPV_Pyruv | 463 | AG-----GATMSHLRFGEKPIKSAY--LLQRCDYVAVHHPSYVHKF-----DVLENIKQG       | 510 |  |
| sp_Q94IN5_PNO_EUGGR_Pyruv | 526 | SG-----GVTSSHLRFGEKPIQAQY--LVTNADYIACHFQYVVKRF-----DMLDAIREG       | 573 |  |
| tr_L8B958_L8B958_CHLRE_Py | 568 | SG-----GVTVSHLRFGEKPIQSPY--LVQQADYLVAVNHQSYMAKY-----DTLASLKP       | 615 |  |
| sp_Q53046_NIFJ_RHORT_Pyru | 468 | SG-----GITISHLRFGEKPIRIPY--LIDQADLIACHNPSYVGRY-----NLLEGIKPG       | 515 |  |
| tr_B5XPH3_B5XPH3_KLEP3_Py | 460 | SG-----GITVSHLRFGEKPIRIPY--LIDQADLIACHNPSYVGRY-----NLLEGIKPG       | 507 |  |
| tr_Q24982_Q24982_GIAIN_Py | 483 | SG-----GVTVSHLRFGEKPIRIPY--LIDQADLIACHNPSYVGRY-----NLLEGIKPG       | 530 |  |
| tr_I2K9Y6_I2K9Y6_9PROT_Py | 51  | RM-----APVEAYVRASSEPIYEVG--EVVYPDIIMIYHSQVVTGKGS-----YTMPFYTGLKPN  | 103 |  |
| tr_Q67231_Q67231_AQUAE_Fe | 45  | RM-----APVEAYVRASDQPIYEVG--EVVYPNVIIMYHPQVITHGKS-----YTMPFYSGLKEN  | 97  |  |
| tr_I0IRW0_I0IRW0_LEPFC_Fe | 47  | RL-----APVESYVRIANGKIYEIG--EIIYPNLIMIFHPQVITHGKS-----YTMPFYSGLKPN  | 99  |  |
| tr_J9ZD37_J9ZD37_LEPFM_Py | 49  | RM-----APAESYVRIGPEKIYDRG--ELVYPDVVVFHPQVITMGKS-----YTMPFYSGIKKN   | 101 |  |
| tr_D3DJJ8_D3DJJ8_HYDTP_Py | 47  | RM-----APAESYVRIGPEKIYDRG--ELVYPDVVVFHPQVITMGKS-----YTMPFYSGIKKN   | 99  |  |
| sp_P84820_PORC_THELN_Pyru | 43  | RG-----APVTAFTTRIDDKPIRIKT--QIYEPDVVVLDPSSLDTV-----DVTAGLKEG       | 90  |  |
| sp_P80907_VORA_METTM_Keto | 338 | RG-----GTSSCGVVISGERVGGSP--AVDTPDVLVAFNQPSSLDE-----FAGDVREG        | 382 |  |
| tr_A1HTT9_A1HTT9_9FIRM_Py | 44  | RG-----GTANCSVIVSDEAIGAP--IVTEPTAVVAMNLPPLDK-----FESALLPG          | 88  |  |
| tr_B0R3G0_B0R3G0_HALS3_Ox | 46  | RG-----GYTAYKVRTSVDQVQSV--VDRDLILIALTERTVDE-----NLDELHAD           | 89  |  |
| tr_H3ZPH3_H3ZPH3_THELN_2- | 42  | RG-----GHSIADLIISKEPIYDL--MVTKADILVALAQLGYSN-----TKNSLREG          | 86  |  |
| tr_Q1IQP1_Q1IQP1_KORVE_2- | 49  | RG-----GACSAQVVIDSKPVLYP--YVTNPDILIVMSQEAATK-----FGPELKPG          | 93  |  |
| tr_E8RJ92_E8RJ92_DESPD_2- | 52  | RG-----GACNAQVIISDVPPIHYP--YVNTPKILVAMSQAGYDK-----FAPALVPE         | 96  |  |
| sp_P80906_KORC_METTM_2-ox | 45  | RG-----GASRAEVVISDEEIDYP--KVQSPDILVAMSHQALLT-----YMDDLKAG          | 89  |  |
| tr_O68230_O68230_HELFX_Oo | 44  | RG-----GPTKVDLSLDRNEIIFPYGKEGEIDFMLSVAQISYNO-----FKSDIKQG          | 90  |  |
| sp_Q53182_KORA_MYCTU_2-ox | 70  | RAPAGTLPGVSSFQIQIADYDILTA--GDRPDVLVAMNPAALKA-----NIGDLPLG          | 119 |  |
| tr_H0DIR4_H0DIR4_9STAP_2- | 46  | KG-----GHTNNKIRVSTSPVHAV--SDNLDILVAFDQETIEV-----NHHEMRAD           | 89  |  |
| tr_O87870_O87870_THAAR_2- | 47  | RG-----GEAAAMLRLSTTPVQSH--DDHF'DMLVAIDWQNVGRF-----AAEVPMAD         | 92  |  |
| tr_B0R4X6_B0R4X6_HALS3_Py | 47  | RG-----GHTYVEIRARDGTVTSR--GDGYNFLALGDSFARNPSEEAVYGDEEVKPLTENLDDLRA | 107 |  |
| tr_D3DI99_D3DI99_HYDTP_2- | 46  | KG-----GYAQSTIRVSNKLYTT--GDGFDILCCFNGEAYEF-----NRKHLRPG            | 89  |  |
| sp_Q07836_IORB_THEKO_Indo | 45  | RF-----GSVIAVRFGEDEVYVAMV--PEGKADVILSFEPVEALR-----YINYLKKG         | 90  |  |
| tr_A1RYA4_A1RYA4_THPD_In  | 45  | RG-----GSVVVFLKYQGQPLSPIV--DQGEADVLLGLELIETLR-----RVPLLSKE         | 90  |  |
| tr_K4MBD5_K4MBD5_9EURY_In | 50  | RG-----GSVVNHIRIGCTLGSMI--SLGADVLLALEPSEALR-----YLDYLAED           | 94  |  |
| sp_P80911_IORB_METTM_Indo | 44  | RG-----GAVSTEIRFGDVRGSI--PQGEADLVIAFEPLEALR-----ALPKMSD            | 88  |  |
| tr_P72578_P72578_SULSP_2- | 44  | KG-----GHSYFSLTISDKRVRSN--TQKIDILVSDFAETVFO-----HFYDVKDI           | 87  |  |
| tr_Q96Y66_Q96Y66_SULTO_2- | 44  | KG-----RHSYFSLTISDKRVRSN--TQKIDILVSDFAETVFO-----HFYDVKDI           | 87  |  |
| tr_Q96XT2_Q96XT2_SULTO_2- | 45  | KG-----RHSYFEVVISSEKPIRSL--SSVYNILASFDAETVFO-----HFTETKEY          | 88  |  |
| Consensus aa:             |     | pt.....t.s.s.h.hs...l.....shlshs...h.....hp.s                      |     |  |

## Conservation:

|                           |     |                                                  |                                          |     |
|---------------------------|-----|--------------------------------------------------|------------------------------------------|-----|
| sp_005650_PORC_THEMA_Pyru | 96  | -----GILLVNTV--KDFE-----                         | -----FVRK--KTGFNGKICVVDATDIALQEI         | 132 |
| tr_M3NSB1_M3NSB1_HELPX_Py | 91  | -----TTYIITSY--LNKE-----                         | -----ELFEKKPELKTRKVFVLDCLKISMETL         | 129 |
| tr_Q3Z8I7_Q3Z8I7_DEHM1_Py | 95  | -----GTLIINTT--KPLD-----                         | -----YFVS--EYGDWRKIATVDATAIAKELL         | 131 |
| sp_P80523_PORC_METBF_Pyru | 91  | -----GIIIVNTT--ENPESL-----                       | -----KLNTKARVMTVDATKVMAMDI               | 125 |
| sp_P80902_PORC_METTM_Pyru | 91  | -----GVVLLNTA--GTFT-----                         | -----SENAKIHTIDATGIALENL                 | 121 |
| tr_W8CQB1_W8CQB1_9EURY_Py | 91  | -----GMVIIINTE--KSKE-----                        | -----EVLEK--LKKKPAKLALVDATTIALEIL        | 128 |
| tr_Q4KY23_Q4KY23_TRIVA_Py | 505 | -----GVFVINFP--GSAD--LNK-----                    | -----DLPGSFRKA--IAEKDAKLYTIDATQIAIDLK    | 549 |
| sp_P94692_POR_DESAF_Pyruv | 508 | -----GTFVLNRP--WSSLEDMDK-----                    | -----HLPSPGIRKRT--IANKKLFYFNIDAVKIATDVG  | 554 |
| tr_Q2RMD6_Q2RMD6_MOOTA_Py | 505 | -----GIFLLNST--WSA--EEMDS-----                   | -----RLPADMKRT--IATKKLKFYFNIDAVKIAQEIG   | 550 |
| tr_C4LTX6_C4LTX6_ENTHI_Py | 503 | -----SVFVLNCP--WTGA--ELEA-----                   | -----QLPGSLKRV--IAEKQIKFYTIDAIIKIQEVK    | 548 |
| sp_Q968X7_PNO_CRYPV_Pyruv | 511 | -----GCFVLNCP--WSTLEELNH-----                    | -----ELPSKIKHQ--IASRDVKFYVIDAQRQAQESN    | 557 |
| sp_Q94IN5_PNO_EUGGR_Pyruv | 574 | -----GTFVLNSR--WTT--EDMEK-----                   | -----EIPADFRRN--VAQKKVRFYFNVDARKICDSFG   | 619 |
| tr_L8B958_L8B958_CHLRE_Py | 616 | -----GVLVLTNTV--FTSPDSLKG-----                   | -----YLPDKVKKQ--IAALKPQLYVIDAQSVAKASG    | 662 |
| sp_Q53046_NIFJ_RHORT_Pyru | 516 | -----ATLLLNCP--HDKD--TVWD-----                   | -----ALPRPVQQT--IIDRDLKLFYVIDANKVIGQETG  | 561 |
| tr_B5XP3_B5XP3_KLEP3_Py   | 508 | -----GTFLNCS--WSEAE--LEQ-----                    | -----HLPVSVRRY--LAQEKIDFYTLNAVDIARELG    | 553 |
| tr_Q24982_Q24982_GIAIN_Py | 531 | -----GFFVLNTE--HDTVETLEK-----                    | -----YLPDEMRE--IARKNIRVYAVNANKVQSVG      | 577 |
| tr_I2K9Y6_I2K9Y6_9PROT_Py | 104 | -----SLIIINTD--FDVL-----                         | -----NEDDIKV--LEDLNATVVQFDATKALDIA       | 143 |
| tr_Q67231_Q67231_AQUAE_Fe | 98  | -----GMIIINS--VDII-----                          | -----PDEDKKI--LEELNAKIYYIPATQIARDIA      | 137 |
| tr_I0IRW0_I0IRW0_LEPFC_Fe | 100 | -----GVVLINSETPINLV-----                         | -----ADEEREL--MER--NARVYYLPATQLSREIA     | 140 |
| tr_J9ZD37_J9ZD37_LEPFM_Py | 102 | -----GIIINDD--IELL-----                          | -----TDSEKEE--LDQMGLVYVYPATKMAALDIA      | 141 |
| tr_D3DJJ8_D3DJJ8_HYDTP_Py | 100 | -----GLIINSE--EDLL-----                          | -----TDEDKEF--LESNLVKNVNFSAKFAIDIA       | 139 |
| sp_P84820_PORC_THELN_Pyru | 91  | -----GMVIVNTE--KTKE-----                         | -----EVLEK--LKKKPAKLALVDATTIALEIL        | 128 |
| sp_P80907_VORA_METTM_Keto | 383 | -----GIVLYDTA--TADF-----                         | -----SKKENLRAIGVPALEIAKEHG               | 415 |
| tr_A1HTT9_A1HTT9_9FIRM_Py | 89  | -----GVLIINSS--LIERS-----                        | -----SKRDDITVYRVPAIDIAAELG               | 122 |
| tr_B0R3G0_B0R3G0_HALS3_Ox | 90  | -----SIIIDYDGD--RTE-----                         | -----FADF--ESPAEVTGLDIPKDLAEDAG          | 125 |
| tr_H3ZPH3_H3ZPH3_THELN_2- | 87  | -----GLLVIDTD-----                               | -----LVKPDREYIGAPFTRLAEK                 | 115 |
| tr_Q1IQP1_Q1IQP1_KORVE_2- | 94  | -----GVLIVEQD--LVKIT-----                        | -----GMSQAGRVYSAPATRLAEELG               | 127 |
| tr_E8RJ92_E8RJ92_DESPD_2- | 97  | -----SVLLVDQD--LVN-----                          | -----PENAPCDHFAIAATRMAENLG               | 128 |
| sp_P80906_KORC_METTM_2-ox | 90  | -----GTLIVDPD--MVEI-----                         | -----NEIQDF--VEERNISYFRAPATRTAEK         | 128 |
| tr_Q68230_Q68230_HELPX_Oo | 91  | -----GIVVMDPN--LVTPTK-----                       | -----EDEEKYQLYKIPISIAKDEV                | 125 |
| sp_Q53182_KORA_MYCTU_2-ox | 120 | -----GMVIVNSD--EFTKRNLT-----                     | -----VGIVTNPLES--GELSDYVVHTVAMTTTLGAV    | 167 |
| tr_H0DIR4_H0DIR4_9STAP_2- | 90  | -----SVIIADSK--AKPDK-----                        | -----PEDCRAQIMIDLPTKTAKELG               | 123 |
| tr_Q87870_Q87870_THAAR_2- | 93  | -----GLVLGDPD--GGE-----                          | -----FPEQ--ILAKGTRRGDIPFKKIAKEID         | 128 |
| tr_B0R4X6_B0R4X6_HALS3_Py | 108 | -----GVIIYDEG--LLDDEDV-----                      | -----GDLEQQ--ADANDWHLYPLDLRGLAKEHG       | 149 |
| tr_D3DI99_D3DI99_HYDTP_2- | 90  | -----TVLVYDSS--DFEP-----                         | -----EEHEGVVMPVPLSHLAKDIM                | 122 |
| sp_Q07836_IORB_THEKO_Indo | 91  | -----GLVFTNAR--PIPPVQVSMGLA-----                 | -----TYPTLDEMKKIV--EEDFGGKFMFADAEKLAMEAG | 143 |
| tr_A1RYA4_A1RYA4_THPD_In  | 91  | -----GVVLANNF--FLPPPAKS-----                     | -----PSRSAVLNA--LKGLGARVVLEADELALKAG     | 137 |
| tr_K4MBD5_K4MBD5_9EURY_In | 95  | -----GVVIVNTE--PILPVTVTSG-----                   | -----CSYDPVGEIMA--SLQGRKRVVGFNATQLAVEAG  | 145 |
| sp_P80911_IORB_METTM_Indo | 89  | -----ACVIVNTS--KIPPNLIKSP-----                   | -----HPYPPLEEIIKT--LEENAGRVRVFNGEKIAVEAG | 140 |
| tr_P72578_P72578_SULSP_2- | 88  | LIYNKAVETTKID--AVQSMPELAERIKDFLTQGYETTQVGALEY--  | ASKNNVTLPVNYDEIAKVA                      | 153 |
| tr_Q96Y66_Q96Y66_SULTO_2- | 88  | LIYNKAVETTKID--AVQSMPELAERIKDFLTQGYETTQVGALEY--  | ASKNNVTLPVNYDEIAKVA                      | 153 |
| tr_Q96XT2_Q96XT2_SULTO_2- | 89  | LIYNVEYENTTVD--LVKSMPEMAEQVKEALSKERLGFTIKDVLEY-- | LKRRGVKVIQFNYTELIKIA                     | 154 |
| <u>Consensus aa:</u>      |     | .....thhllhss.....                               | .....p.....p.hh.hsh.plt.p..              |     |

| Conservation:             |     | 8            | 7                                                       |                            |
|---------------------------|-----|--------------|---------------------------------------------------------|----------------------------|
| sp_005650_PORC_THEMA_Pyru | 133 | K-----K      | GIPNTPMLGALVRV-----TGI-VPLEAIEKRIEKMG                   | ---KKFPQEVIDANKRALRRG 184  |
| tr_M3NSB1_M3NSB1_HELPX_Py | 130 | K-----R      | PIPNTPMLGALMKV-----SGM-LEIEAFKEAFKKVLG                  | ---KKLTQOEVIDANMLAIQRA 181 |
| tr_Q3Z8I7_Q3Z8I7_DEHM1_Py | 132 | G-----V      | NIVNTTMLGALIKA-----TGL-AGIEDFEEPLKHRFG                  | -----KLAAKNMAAMKKA 178     |
| sp_P80523_PORC_METBF_Pyru | 126 | G-----V      | PIVNTVLLGAFAGA-----TGE-INVESIQHAIRARFS                  | -----GKVGKNNANAIQKA 173    |
| sp_P80902_PORC_METTM_Pyru | 122 | G-----R      | PIVNTVMLGAFAGV-----TGL-VSIDSLIKIIKETFP                  | -----GKIGDKNAEAAARIA 169   |
| tr_W8CQB1_W8CQB1_9EURY_Py | 129 | G-----L      | PITNTSILGAVAKA-----TGI-VKIESVEKAIKETFS                  | -----GELGEKNAKAAREA 176    |
| tr_Q4KY23_Q4KY23_TRIVA_Py | 550 | L-----P      | GRINMLMQTVFFGL-----ANI-IPAEECIALLKKSIAKQ                | ARKGKEVIQKNWDMVDHA 604     |
| sp_P94692_POR_DESAF_Pyruv | 554 | L-----G      | RINMIMQTAFFKL-----AGV-LPFEKAVDLLKKSIIHKA                | GKKGKEIVKMNTDAVDQA 609     |
| tr_Q2RMD6_Q2RMD6_MOOTA_Py | 551 | L-----G      | RINVMQTAFFKI-----ANV-IPVDEAIIKYIKDSIVKTY                | GKKGDKILNMNFAAVDRA 605     |
| tr_C4LTX6_C4LTX6_ENTHI_Py | 549 | L-----G      | RINMIMQTVFFKL-----ANV-IPFEKAVLLKEAVQKTY                 | GAKGPAIVKMNHDAIDKA 603     |
| sp_Q968X7_PNO_CRYPV_Pyruv | 558 | L-----G      | RINNILMVVFFSL-----TNI-IPDLDAIKLVKEAIKKT                 | GKKGDVAVNSNWKAVDLT 612     |
| sp_Q94IN5_PNO_EUGGR_Pyruv | 630 | L-----G      | RINMLMQACFFKL-----SGV-LPLAEAQRLLNESIVHEY                | GKKGGKVVEMNQAVVNAV 674     |
| tr_L8B958_L8B958_CHLRE_Py | 663 | L-----G      | KHVNVMVMTVFFNL-----SGV-LPMEKALALLKKSITKA                | ERKGPVAVKNSHSAVDMA 717     |
| sp_Q53046_NIFJ_RHORT_Pyru | 562 | M-----Q      | RINTIMQTCFFAL-----SGV-MPRDEAIEEIKKAISKTY                | ARKSQOEVIDANFAAVDQT 616    |
| tr_B5XPH3_B5XPH3_KLEP3_Py | 554 | L-----G      | RFNMLMQAFAFFKL-----TAI-IDPQTAADYLYKQAVEKS               | GSKGASVIEMNQRAIELG 608     |
| tr_Q24982_Q24982_GIAIN_Py | 578 | L-----G      | RINTIMILFLLKGLSKLLDFDVCEDMKAAARITYA                     | ---KQKAEVIEANVKAIQDVA 634  |
| tr_I2K9Y6_I2K9Y6_9PROT_Py | 144 | GT-----E     | LATNMAMGMMLLGL-----TKL-VTENIEAAVKERFL                   | ----GTSFVSSGGTAMLDSA 194   |
| tr_O67231_O67231_AQUAE_Fe | 138 | GT-----E     | LATNMAMVGTFFGI-----TRL-VTLEHIEKALIERFL                  | ----GGTFVASGGTALDSA 188    |
| tr_I0IRW0_I0IRW0_LEPFC_Fe | 141 | DT-----D     | LATNMAMVAVSAI-----MGI-PDLPSLEQSVKERFL                   | ----GKGFVSSGGTALDNDV 191   |
| tr_J9ZD37_J9ZD37_LEPFM_Py | 142 | GT-----E     | LSTNMAMIGSVSGL-----TDV-IGMEALDLALQDRFG                  | ----KKYVASGGTATLDEA 191    |
| tr_D3DJJ8_D3DJJ8_HYDTP_Py | 140 | GT-----E     | LSTNMAMIGALFGA-----VGC-VGLEAIEHGIKSRFL                  | ----KCFVASGGTALDSA 189     |
| sp_P84820_PORC_THELN_Pyru | 129 | G-----L      | PITNTSILGAVAKA-----TGI-VKIESVEEAIKDTFS                  | -----GELGKNAKAAREA 176     |
| sp_P80907_VORA_METTM_Keto | 416 | T-----G      | RANTAMLVMMAL-----GITG-LDEESFRDAIRFTFS                   | ----GKDKIIDINLKILEAG 466   |
| tr_A1HTT9_A1HTT9_9FIRM_Py | 123 | N-----S      | KVANMVVLGALIAA-----TGA-VATTSVLKAFQKMPA                  | ----KKPELLAINEQAIHRG 172   |
| tr_B0R3G0_B0R3G0_HALS3_Ox | 126 | G-----A      | IMRNIVALGAVCAV-----ADF--PIENLDESLEKRS                   | ----GKGEQIENNKAARLG 175    |
| tr_H3ZPH3_H3ZPH3_THELN_2- | 116 | GL-----A     | TVNMVALGYLVAK-----INI-VKKESVEKAIARRVP                   | ----KGTEEINLKAFRIG 164     |
| tr_Q1IQP1_Q1IQP1_KORVE_2- | 128 | K-----R      | MILNIVMVGTAAV-----TNI-LQKESLREAVASSVP                   | -----PSFRELNLKAFDRG 175    |
| tr_E8RJ92_E8RJ92_DESPD_2- | 129 | N-----K      | MANIIMLGFCTAI-----TKA-VSSEAAQATIROQSV                   | ----KGTEERNIEAFTKG 176     |
| sp_P80906_KORC_METTM_2-ox | 129 | GI-----T     | IVANVMVIGALTEA-----TGV-VSVRAEEAIAKNSVP                  | -----PGTEKNIMAFQAG 177     |
| tr_O68230_O68230_HELPX_Oo | 126 | GN-----I     | TQSVALAITAEF-----TKC-VEENIALDTMLKKVP                    | -----AKVADTNKKAFEIG 174    |
| sp_O53182_KORA_MYCTU_2-ox | 168 | EAIGASKKDGGR | AKNMFALGLLSWM-----YGR--ELEHSEAFIREKFA                   | ----RKPEIAEANVLALKAG 225   |
| tr_H0DIR4_H0DIR4_9STAP_2- | 124 | T-----T      | LKNMVAVGATCAL-----MDL--ETETFESLITAME                    | ----KKGDKVEMNIQALHEG 173   |
| tr_O87870_O87870_THAAR_2- | 129 | G-----G      | RPMIALGTVAAL-----VGL--PEDAVLKVIKDSL                     | A---KKGPAALAAESEASVRAG 177 |
| tr_B0R4X6_B0R4X6_HALS3_Py | 150 | R-----E      | MRNTAGVGATAAL-----IDM--DLDHIEDLMSDAMG                   | -----GDILEQNLTVLRDA 196    |
| tr_D3DI99_D3DI99_HYDTP_2- | 123 | KA-----Y     | ITKNVIALGVLCGL-----FDI--PVQSIKDSIKAKFL                  | ----RKQGEIIEELNYKALETG 173 |
| sp_O07836_IORB_THEKO_Indo | 144 | N-----I      | VTVNVLLIGALSQT-----PGFPLSEEQIKEVIRISVP                  | -----PKTIDVNMRAFELG 192    |
| tr_A1RYA4_A1RYA4_THPD_In  | 138 | S-----P      | ITVNMVMLGALIGT-----GRID-LTLEDAADVLRSRFK                 | -----GKVLEMNLEALKLG 186    |
| tr_K4MBD5_K4MBD5_9EURY_In | 146 | N-----A      | QAMNVIMVGAISNY-----LPL--SPDIMLDCVRELVP                  | -----PKTVDINVKAFELG 192    |
| sp_P80911_IORB_METTM_Indo | 141 | H-----I      | LSLNMVMLGAAAAT-----TGFPLGEETLIESMKNNLP                  | -----PKLMEVNLRAFHEG 189    |
| tr_P72578_P72578_SULSP_2- | 154 | DEM          | KVPLSVTERVKNIVGITISYKL-----LGL--DVNYLIEAINSTFK          | -----QDLYRKMNELAVKDS 210   |
| tr_Q96Y66_Q96Y66_SULTO_2- | 154 | DEM          | KVPLSVTERVKNIVGITISYKL-----LGL--DVNYLIEAINSTFK          | -----QDLYRKMNELAVKDS 210   |
| tr_Q96XT2_Q96XT2_SULTO_2- | 155 | DTFKVPMSVVER | AKNMIAVGASYGL-----LGL--KFDYLDKDAISSTFK                  | -----NELFIKNTMAAELG 211    |
| Consensus aa:             |     |              | .....Nhhh.shhh.h.....sh.l..p.h...hpp.h.....h.p.N..thc.t |                            |

Cyan – Adenine binding asparagine

Green – Aromatic residues that can possibly form pi-pi interaction with adenine moiety of CoA

Magenta – Cationic residues that can possibly form cation-pi interactions with adenine moiety of CoA

## Conservation:

|                           |     |                                                                       |     |
|---------------------------|-----|-----------------------------------------------------------------------|-----|
| sp_005650_PORC_THEMA_Pyru | 185 | YEE--VKCSE-----                                                       | 192 |
| tr_M3NSB1_M3NSB1_HELPX_Py | 182 | YEE--VQ-----                                                          | 186 |
| tr_Q3Z8I7_Q3Z8I7_DEHM1_Py | 179 | LEE--TAVKEL-KVG-----                                                  | 190 |
| sp_P80523_PORC_METBF_Pyru | 174 | YKL--IRGEEA-----                                                      | 182 |
| sp_P80902_PORC_METTM_Pyru | 170 | YEK--MKHSG-----                                                       | 177 |
| tr_W8CQB1_W8CQB1_9EURY_Py | 177 | FEK--TVVYEL-----                                                      | 185 |
| tr_Q4KY23_Q4KY23_TRIVA_Py | 605 | LQG--LKEFKY-NKAEWLN--AP-----VEPRPKHE-----GIR--HIIDMSI                 | 640 |
| sp_P94692_POR_DESAF_Pyruv | 610 | VTS--LQEFKY-PDSWKDA--PAET-----KAEPMTNE-----FFK--NVVKPIL               | 647 |
| tr_Q2RMD6_Q2RMD6_MOOTA_Py | 606 | LEA--LEEIKY-PASWADA--VDEA-----AATVTEEP-----EFIQ-KVLRPIN               | 644 |
| tr_C4LTX6_C4LTX6_ENTHI_Py | 604 | LDG--LVEVKV-PAEWANA--PLET-----VTKIEAPE-----FVT--DVLMPQL               | 641 |
| sp_Q968X7_PNO_CRYPV_Pyruv | 613 | LES--LIQISYDKSQWISK--DKCGEKS-LPATAVETGNKDQEITKSTVLKQKPEHDVNFVKDILGPVN | 677 |
| sp_Q94IN5_PNO_EUGGR_Pyruv | 675 | FAGDLPQEVQV-PAAWANA--VDTS-----TRTPTGIE-----FVD--KIMRPLM               | 714 |
| tr_L8B958_L8B958_CHLRE_Py | 718 | VAA--LKLDI-PASWSSL--PTHVVNP-NPPAEGNTRSWE-----FIE--TVAKPML             | 762 |
| sp_Q53046_NIFJ_RHORT_Pyru | 617 | LSR--LQSVTI-PGVLTGH--ALPP-----LVSAGAPD-----FVR--NVTAVML               | 654 |
| tr_B5XPH3_B5XPH3_KLEP3_Py | 609 | MAA--LHRVTV-PAHWATL--EAPA-----PQASALMPD-----FIR--DILQPMN              | 647 |
| tr_Q24982_Q24982_GIAIN_Py | 635 | RSI--IEQCHI-EYDKARW--VNADPSESTANQTYGPEPDK-----YVK--DIILPAV            | 680 |
| tr_I2K9Y6_I2K9Y6_9PROT_Py | 195 | IEK--KFKKKE-ELLAKNM--EVIN-----                                        | 214 |
| tr_O67231_O67231_AQUAE_Fe | 189 | IEK--KFKKKQ-ELLAKNM--EVIK-----                                        | 208 |
| tr_I0IRW0_I0IRW0_LEPFC_Fe | 192 | IER--KFAKKE-QLLKNN--EVIV-----                                         | 211 |
| tr_J9ZD37_J9ZD37_LEPFM_Py | 192 | IKK--KFAKKE-MLLQKNL--DTIK-----                                        | 211 |
| tr_D3DJJ8_D3DJJ8_HYDTT_Py | 190 | LER--KFKKKL-ELIEKNL--STAK-----                                        | 209 |
| sp_P84820_PORC_THELN_Pyru | 177 | FEK--TVVYEL-----                                                      | 185 |
| sp_P80907_VORA_METTM_Keto | 467 | ADW--ARKNLE-GEF-----                                                  | 478 |
| tr_A1HTT9_A1HTT9_9FIRM_Py | 173 | AEC--IKK-----                                                         | 178 |
| tr_B0R3G0_B0R3G0_HALS3_Ox | 176 | AEY--VAEEFE-DVTLPEY--LETT-----DEDYV-----LLNGDEAIGMGA                  | 212 |
| tr_H3ZPH3_H3ZPH3_THELN_2- | 165 | YEE--GLR-----                                                         | 170 |
| tr_Q1IQP1_Q1IQP1_KORVE_2- | 176 | YEY--GVQALQ-TTPETGV--DENT-----VKVY-----                               | 199 |
| tr_E8RJ92_E8RJ92_DESPD_2- | 177 | FDY--GLSTLK-GREKRAA--GQTG-----AKAQ-----                               | 200 |
| sp_P80906_KORC_METTM_2-ox | 178 | REL--IMEGQK-----                                                      | 186 |
| tr_O68230_O68230_HELPX_Oo | 175 | KKH--ALEALK-K-----                                                    | 184 |
| sp_O53182_KORA_MYCTU_2-ox | 226 | WNY--GETTEA-FGTTYEIPATLP-----PGEYR-----QISGNTALAYGI                   | 264 |
| tr_H0DIR4_H0DIR4_9STAP_2- | 174 | YRL--MQEQLE-TVEGDFQ-LTASQ-----QDPHL-----YMIGNDAIGLGA                  | 211 |
| tr_O87870_O87870_THAAR_2- | 178 | MAF--AASLPP-SKKLAAA--AGGE-----RQRLW-----SITGNEAAGLGA                  | 214 |
| tr_B0R4X6_B0R4X6_HALS3_Py | 197 | YEQ--VSEMEH-THDLSVP--TGSB-----DEPQV-----LMSGSHAIAYGA                  | 233 |
| tr_D3DI99_D3DI99_HYDTT_2- | 174 | INY--VRENIK-KLDGYLF--PPAKE-----PKDVV-----IMEGNQAIKGA                  | 211 |
| sp_O07836_IORB_THEKO_Indo | 193 | VKA--AKEMLG-L-----                                                    | 202 |
| tr_A1RYA4_A1RYA4_THEPD_In | 187 | YTA--AQEQLE-GQRL-----                                                 | 199 |
| tr_K4MBD5_K4MBD5_9EURY_In | 193 | RAQ--THV-----                                                         | 198 |
| sp_P80911_IORB_METTM_Indo | 190 | FET--VNCD-----                                                        | 196 |
| tr_P72578_P72578_SULSP_2- | 211 | YDI--VESRYN-LKPSSK-----ERRRF-----WLDGNTAVAIGK                         | 242 |
| tr_Q96Y66_Q96Y66_SULTO_2- | 211 | YDI--VESRYN-LKPSSK-----ERRRF-----WLDGNTAVAIGK                         | 242 |
| tr_Q96XT2_Q96XT2_SULTO_2- | 212 | YNS--VPNVYK-LQYKI-----EKQRI-----QVDGNTISAMGK                          | 243 |
| <u>Consensus aa:</u>      |     | hp.....                                                               |     |

Table S4. Sequences of domain III used in sequence alignment

| Number | Organism                                | UniProt ID |
|--------|-----------------------------------------|------------|
| 1      | <i>Thermotoga maritime</i>              | O05650     |
| 2      | <i>Helicobacter pylori</i>              | M3NSB1     |
| 3      | <i>Dehalococcoides mccartyi</i>         | Q3Z8I7     |
| 4      | <i>Methanosarcina barkeri</i>           | P80523     |
| 5      | <i>Methanothermobacter marburgensis</i> | P80902     |
| 6      | <i>Thermococcus guaymasensis</i>        | W8CQB1     |
| 7      | <i>Trichomonas vaginalis</i>            | Q4KY23     |
| 8      | <b><i>Desulfovibrio africanus</i></b>   | P94692     |
| 9      | <b><i>Moorella thermoacetica</i></b>    | Q2RMD6     |
| 10     | <i>Entamoeba histolytica</i>            | C4LTX6     |
| 11     | <i>Cryptosporidium parvum</i>           | Q968X7     |
| 12     | <i>Euglena gracilis</i>                 | Q94IN5     |
| 13     | <i>Chlamydomonas reinhardtii</i>        | L8B958     |
| 14     | <i>Rhodospirillum rubrum</i>            | Q53046     |
| 15     | <i>Klebsiella pneumoniae</i>            | B5XPH3     |
| 16     | <i>Giardia intestinalis</i>             | Q24982     |
| 29     | <i>Sulfurovum sp. AR</i>                | I2K9Y6     |
| 30     | <i>Aquifex aeolicus</i>                 | O67231     |
| 31     | <i>Leptospirillum ferrooxidans</i>      | I0IRW0     |
| 32     | <i>Leptospirillum ferriphilum</i>       | J9ZD37     |
| 33     | <i>Hydrogenobacter thermophiles</i>     | D3DJJ8     |
| 34     | <i>Thermococcus litoralis</i>           | P84820     |
| 35     | <i>Methanothermobacter marburgensis</i> | P80907     |
| 36     | <i>Thermosinus carboxydivorans</i>      | A1HTT9     |
| 37     | <i>Halobacterium salinarum</i>          | B0R3G0     |
| 38     | <i>Thermococcus litoralis</i>           | H3ZPH3     |
| 39     | <i>Koribacter versatilis</i>            | Q1IQP1     |
| 40     | <i>Desulfobulbus propionicus</i>        | E8RJ92     |
| 41     | <i>Methanothermobacter marburgensis</i> | P80906     |
| 42     | <i>Helicobacter pylori</i>              | O68230     |
| 43     | <i>Mycobacterium tuberculosis</i>       | O53182     |
| 44     | <i>Staphylococcus pettenkoferi</i>      | H0DIR4     |
| 45     | <i>Thauera aromatica</i>                | O87870     |
| 46     | <i>Halobacterium salinarum</i>          | B0R4X6     |
| 47     | <i>Hydrogenobacter thermophilus</i>     | D3DI99     |
| 48     | <i>Thermococcus kodakaraensis</i>       | O07836     |
| 49     | <i>Thermofilum pendens</i>              | A1RYA4     |
| 50     | <i>Methanobolus psychrophilus</i>       | K4MBD5     |
| 51     | <i>Methanothermobacter marburgensis</i> | P80911     |
| 52     | <i>Sulfolobus sp.</i>                   | P72578     |
| 53     | <b><i>Sulfolobus tokodaii</i></b>       | Q96Y66     |
| 54     | <b><i>Sulfolobus tokodaii</i></b>       | Q96XT2     |

Cyan: “Group 3” PFOR/VOR; Purple: “Group 4” PFOR; Blue: “Group 5 PFOR/OGOR; Yellow: “Group 6” IOR; Red: “Group 7” VOR; Orange : “Group 8” OGOR.

The numbers 1-16 and 29-52 are the same as the numbers used in our previous phylogenetic analysis. Two OFORs from *Sulfolobus tokodaii* are numbered 53 and 54. Based on sequence and domain composition, two StOFORs would be classified as Group 8 OGOR.

## SI Appendix – References

1. Menon S & Ragsdale SW (1997) Mechanism of the *Clostridium thermoaceticum* pyruvate: ferredoxin oxidoreductase: evidence for the common catalytic intermediacy of the hydroxyethylthiamine pyropyrosphate radical. *Biochemistry* 36(28):8484-8494.
2. Otwinowski Z & Minor W (1997) [20] Processing of X-ray diffraction data collected in oscillation mode. *Methods Enzymol* 276:307-326.
3. McCoy AJ, *et al.* (2007) Phaser crystallographic software. *J Appl Crystallogr* 40(4):658-674.
4. Adams PD, *et al.* (2010) PHENIX: a comprehensive Python-based system for macromolecular structure solution. *Acta Crystallogr D Biol Crystallogr* 66(2):213-221.
5. Cavazza C, *et al.* (2006) Flexibility of thiamine diphosphate revealed by kinetic crystallographic studies of the reaction of pyruvate-ferredoxin oxidoreductase with pyruvate. *Structure* 14(2):217-224.
6. Bunkóczi G & Read RJ (2011) Improvement of molecular-replacement models with Sculptor. *Acta Crystallogr D Biol Crystallogr* 67(4):303-312.
7. Emsley P, Lohkamp B, Scott WG, & Cowtan K (2010) Features and development of Coot. *Acta Crystallogr D Biol Crystallogr* 66(4):486-501.
8. Kung Y, Doukov TI, Seravalli J, Ragsdale SW, & Drennan CL (2009) Crystallographic snapshots of cyanide-and water-bound C-clusters from bifunctional carbon monoxide dehydrogenase/acetyl-CoA synthase. *Biochemistry* 48(31):7432-7440.
9. Kutter S, *et al.* (2009) Covalently bound substrate at the regulatory site of yeast pyruvate decarboxylases triggers allosteric enzyme activation. *J Biol Chem* 284(18):12136-12144.
10. Agarwal V, Metlitskaya A, Severinov K, & Nair SK (2011) Structural basis for microcin C7 inactivation by the MccE acetyltransferase. *J Biol Chem* 286(24):21295-21303.
11. Hariharan PC & Pople JA (1973) The influence of polarization functions on molecular orbital hydrogenation energies. *Theoret Chim Acta* 28(3):213-222.
12. Lee C, Yang W, & Parr R (1988) Density-functional exchange-energy approximation with correct asymptotic behaviour. *Phys Rev B* 37:785-789.
13. Becke AD (1993) Becke's three parameter hybrid method using the LYP correlation functional. *J Chem Phys* 98:5648-5652.
14. Frisch M, *et al.* (2008) Gaussian 03, revision C. 02 (Gaussian Inc.).
15. Morin A, *et al.* (2013) Cutting edge: Collaboration gets the most out of software. *eLife* 2:e01456.
16. Gibson MI, Chen PY-T, & Drennan CL (2016) A structural phylogeny for understanding 2-oxoacid oxidoreductase function. *Curr Opin Struct Biol* 41:54-61.
17. Pei J, Kim B-H, & Grishin NV (2008) PROMALS3D: a tool for multiple protein sequence and structure alignments. *Nucleic Acids Res* 36(7):2295-2300.
18. Gibson MI, *et al.* (2015) The structure of an oxalate oxidoreductase provides insight into microbial 2-oxoacid metabolism. *Biochemistry* 54(26):4112-4120.
19. Yan Z, Maruyama A, Arakawa T, Fushinobu S, & Wakagi T (2016) Crystal structures of archaeal 2-oxoacid: ferredoxin oxidoreductases from *Sulfolobus tokodaii*. *Sci Rep* 6:33061.
20. Gibson MI, *et al.* (2016) One-carbon chemistry of oxalate oxidoreductase captured by X-ray crystallography. *Proc Natl Acad Sci USA* 113(2):320-325.
21. Furdui C & Ragsdale SW (2002) The roles of coenzyme A in the pyruvate: ferredoxin oxidoreductase reaction mechanism: rate enhancement of electron transfer from a radical intermediate to an iron-sulfur cluster. *Biochemistry* 41(31):9921-9937.
22. Mansoorabadi SO, *et al.* (2006) EPR spectroscopic and computational characterization of the hydroxyethylidene-thiamine pyrophosphate radical intermediate of pyruvate: ferredoxin oxidoreductase. *Biochemistry* 45(23):7122-7131.
23. Reed GH, Ragsdale SW, & Mansoorabadi SO (2012) Radical reactions of thiamin pyrophosphate in 2-oxoacid oxidoreductases. *BBA Proteins Proteomics* 1824(11):1291-1298.
24. Pierce E, Mansoorabadi SO, Can M, Reed GH, & Ragsdale SW (2017) Properties of intermediates in the catalytic cycle of oxalate oxidoreductase and its suicide inactivation by pyruvate. *Biochemistry* 56(22):2824-2835.
